# Supplementary material for: Compound kushen injection suppresses human acute myeloid leukaemia by regulating the Prdxs/ROS/Trx1 signalling pathway
Source: J Exp Clin Cancer Res. 2018 Nov 19;37:277. doi: 10.1186/s13046-018-0948-3 (PMC6245615; doi:10.1186/s13046-018-0948-3)
Supplement: Supplementary file 8 — Table S2. The identified proteins by LC-MS/MS. (XLSX 74 kb) [file 13046_2018_948_MOESM8_ESM.xlsx]

## Sheet: DEPs
Table S2. The identified proteins by LC-MS/MS.
Accession	Protein name	Peptides(95%)	CKI/Control
sp|Q9ULD2|MTUS1_HUMAN	Microtubule-associated tumor suppressor 1	1	0.0187335
sp|Q969V3|NCLN_HUMAN	Nicalin	3	0.0257509
RRRRRsp|Q96ST8|CEP89_HUMAN	REVERSED Centrosomal protein of 89 kDa	1	0.0304087
sp|P49736|MCM2_HUMAN	DNA replication licensing factor MCM2	2	0.0447081
RRRRRsp|Q86SG6|NEK8_HUMAN	REVERSED Serine/threonine-protein kinase Nek8	1	0.0469166
tr|B0QY89|B0QY89_HUMAN	Eukaryotic translation initiation factor 3 subunit L	1	0.0513213
tr|M0QYR6|M0QYR6_HUMAN	Urokinase plasminogen activator surface receptor (Fragment)	2	0.053327
tr|B4DL54|B4DL54_HUMAN	CHURC1-FNTB readthrough	1	0.065217
RRRRRsp|Q969V4|TEKT1_HUMAN	REVERSED Tektin-1	1	0.070861
tr|S4R3Z2|S4R3Z2_HUMAN	Aldo-keto reductase family 1 member C3	1	0.0714601
sp|P51991|ROA3_HUMAN	Heterogeneous nuclear ribonucleoprotein A3	3	0.0861125
sp|Q08AH1|ACSM1_HUMAN	Acyl-coenzyme A synthetase ACSM1, mitochondrial	1	0.0861333
tr|B3KQV6|B3KQV6_HUMAN	Serine/threonine-protein phosphatase 2A 65 kDa regulatory subunit A alpha isoform	1	0.108888
sp|P30038|AL4A1_HUMAN	Delta-1-pyrroline-5-carboxylate dehydrogenase, mitochondrial	1	0.110671
sp|Q5JRA6|MIA3_HUMAN	Melanoma inhibitory activity protein 3	1	0.115984
sp|O75439|MPPB_HUMAN	Mitochondrial-processing peptidase subunit beta	2	0.133318
sp|P05386|RLA1_HUMAN	60S acidic ribosomal protein P1	2	0.136723
sp|O75083|WDR1_HUMAN	WD repeat-containing protein 1	2	0.149007
tr|J3KPM9|J3KPM9_HUMAN	Signal transducer and activator of transcription	4	0.156449
sp|P07686|HEXB_HUMAN	Beta-hexosaminidase subunit beta	4	0.177287
sp|Q13442|HAP28_HUMAN	28 kDa heat- and acid-stable phosphoprotein	1	0.182625
sp|P41218|MNDA_HUMAN	Myeloid cell nuclear differentiation antigen	2	0.187688
tr|Q6P452|Q6P452_HUMAN	Annexin	7	0.199747
tr|D6RF35|D6RF35_HUMAN	Vitamin D-binding protein	1	0.201143
tr|H3BPR2|H3BPR2_HUMAN	Nucleoside diphosphate kinase	1	0.202416
sp|O14818|PSA7_HUMAN	Proteasome subunit alpha type-7	2	0.2106
sp|Q92896|GSLG1_HUMAN	Golgi apparatus protein 1	1	0.212515
tr|F8W6I7|F8W6I7_HUMAN	Heterogeneous nuclear ribonucleoprotein A1	3	0.217491
tr|A6NLN1|A6NLN1_HUMAN	Polypyrimidine tract binding protein 1, isoform CRA_b	2	0.219324
tr|B0YIW6|B0YIW6_HUMAN	Archain 1, isoform CRA_a	1	0.219767
sp|Q3ZCQ8|TIM50_HUMAN	Mitochondrial import inner membrane translocase subunit TIM50	1	0.225456
sp|P22626|ROA2_HUMAN	Heterogeneous nuclear ribonucleoproteins A2/B1	5	0.22773
sp|P31939|PUR9_HUMAN	Bifunctional purine biosynthesis protein PURH	2	0.231169
sp|O43390|HNRPR_HUMAN	Heterogeneous nuclear ribonucleoprotein R	6	0.231747
sp|P00491|PNPH_HUMAN	Purine nucleoside phosphorylase	2	0.234478
sp|Q93077|H2A1C_HUMAN	Histone H2A type 1-C	4	0.24823
sp|P08567|PLEK_HUMAN	Pleckstrin	5	0.249379
sp|P60842|IF4A1_HUMAN	Eukaryotic initiation factor 4A-I	2	0.253353
sp|Q00839|HNRPU_HUMAN	Heterogeneous nuclear ribonucleoprotein U	7	0.256272
tr|I3L3E9|I3L3E9_HUMAN	Flap endonuclease 1 (Fragment)	1	0.261696
tr|A0A087WVQ6|A0A087WVQ6_HUMAN	Clathrin heavy chain	20	0.276031
sp|Q5JRX3|PREP_HUMAN	Presequence protease, mitochondrial	1	0.280445
tr|A0A087X253|A0A087X253_HUMAN	AP complex subunit beta	1	0.281505
sp|Q15942|ZYX_HUMAN	Zyxin	3	0.282698
sp|Q5UIP0|RIF1_HUMAN	Telomere-associated protein RIF1	1	0.295713
tr|H0YMF4|H0YMF4_HUMAN	60S ribosomal protein L28	2	0.29577
tr|X6R2L4|X6R2L4_HUMAN	RuvB-like helicase	2	0.297494
sp|Q92478|CLC2B_HUMAN	C-type lectin domain family 2 member B	3	0.305659
sp|P42126|ECI1_HUMAN	Enoyl-CoA delta isomerase 1, mitochondrial	2	0.313944
sp|O00299|CLIC1_HUMAN	Chloride intracellular channel protein 1	5	0.316886
tr|A0A0C4DGB6|A0A0C4DGB6_HUMAN	Serum albumin	9	0.324444
tr|A0A024QZ42|A0A024QZ42_HUMAN	HCG1985580, isoform CRA_c	1	0.325179
sp|P32942|ICAM3_HUMAN	Intercellular adhesion molecule 3	1	0.32806
sp|P02749|APOH_HUMAN	Beta-2-glycoprotein 1	1	0.337735
sp|Q92522|H1X_HUMAN	Histone H1x	2	0.339338
sp|P07910|HNRPC_HUMAN	Heterogeneous nuclear ribonucleoproteins C1/C2	3	0.345233
sp|O15143|ARC1B_HUMAN	Actin-related protein 2/3 complex subunit 1B	1	0.345635
sp|O76071|CIAO1_HUMAN	Probable cytosolic iron-sulfur protein assembly protein CIAO1	1	0.34774
sp|P52597|HNRPF_HUMAN	Heterogeneous nuclear ribonucleoprotein F	3	0.349721
sp|P62306|RUXF_HUMAN	Small nuclear ribonucleoprotein F	2	0.352463
sp|P09874|PARP1_HUMAN	Poly [ADP-ribose] polymerase 1	7	0.35464
sp|Q9ULC4|MCTS1_HUMAN	Malignant T-cell-amplified sequence 1	1	0.356379
tr|A0A1C7CYX9|A0A1C7CYX9_HUMAN	Dihydropyrimidinase-related protein 2	3	0.356449
sp|P01023|A2MG_HUMAN	Alpha-2-macroglobulin	2	0.359065
tr|B8ZZW7|B8ZZW7_HUMAN	Prothymosin alpha	2	0.362016
sp|P02765|FETUA_HUMAN	Alpha-2-HS-glycoprotein	3	0.36778
sp|P52566|GDIR2_HUMAN	Rho GDP-dissociation inhibitor 2	7	0.375035
tr|E7ER44|E7ER44_HUMAN	Lactotransferrin	2	0.375969
tr|D6RCF4|D6RCF4_HUMAN	CDGSH iron-sulfur domain-containing protein 2	1	0.376194
sp|Q14974|IMB1_HUMAN	Importin subunit beta-1	5	0.379081
tr|J3KQE5|J3KQE5_HUMAN	GTP-binding nuclear protein Ran (Fragment)	6	0.380503
tr|A0A0U1RQF0|A0A0U1RQF0_HUMAN	Fatty acid synthase	3	0.380606
sp|P08238|HS90B_HUMAN	Heat shock protein HSP 90-beta	22	0.3855
sp|Q9H488|OFUT1_HUMAN	GDP-fucose protein O-fucosyltransferase 1	1	0.386033
sp|Q9UNZ2|NSF1C_HUMAN	NSFL1 cofactor p47	4	0.386401
sp|O43488|ARK72_HUMAN	Aflatoxin B1 aldehyde reductase member 2	1	0.388362
sp|P22314|UBA1_HUMAN	Ubiquitin-like modifier-activating enzyme 1	9	0.388729
sp|P54577|SYYC_HUMAN	Tyrosine--tRNA ligase, cytoplasmic	1	0.396018
sp|Q16740|CLPP_HUMAN	ATP-dependent Clp protease proteolytic subunit, mitochondrial	2	0.397607
tr|G3XAI2|G3XAI2_HUMAN	Laminin subunit beta-1	1	0.403341
sp|P49321|NASP_HUMAN	Nuclear autoantigenic sperm protein	3	0.405405
sp|P61981|1433G_HUMAN	14-3-3 protein gamma	7	0.408034
sp|O15117|FYB_HUMAN	FYN-binding protein	1	0.409134
RRRRRsp|Q00534|CDK6_HUMAN	REVERSED Cyclin-dependent kinase 6	1	0.410289
sp|Q15427|SF3B4_HUMAN	Splicing factor 3B subunit 4	2	0.411444
tr|E9PGT1|E9PGT1_HUMAN	Translin	2	0.414936
tr|A0A0A6YYA0|A0A0A6YYA0_HUMAN	Protein TMED7-TICAM2	2	0.427315
tr|C9J2C0|C9J2C0_HUMAN	Tubulin alpha chain (Fragment)	6	0.428111
tr|B4E3S0|B4E3S0_HUMAN	Coronin	1	0.429188
tr|A0A087WUL2|A0A087WUL2_HUMAN	Proteasome subunit beta type-3 (Fragment)	1	0.437584
sp|P19623|SPEE_HUMAN	Spermidine synthase	2	0.441806
sp|P08133|ANXA6_HUMAN	Annexin A6	22	0.447104
sp|P62805|H4_HUMAN	Histone H4	10	0.45415
tr|G8JLB6|G8JLB6_HUMAN	Heterogeneous nuclear ribonucleoprotein H	3	0.457906
tr|A0A1B0GW05|A0A1B0GW05_HUMAN	Probable C-mannosyltransferase DPY19L1	1	0.473798
sp|Q5VTE0|EF1A3_HUMAN	Putative elongation factor 1-alpha-like 3	9	0.478467
sp|Q08211|DHX9_HUMAN	ATP-dependent RNA helicase A	5	0.480583
tr|F6S2S5|F6S2S5_HUMAN	LIM and SH3 domain protein 1	1	0.481091
sp|Q9UQE7|SMC3_HUMAN	Structural maintenance of chromosomes protein 3	1	0.48213
sp|P68363|TBA1B_HUMAN	Tubulin alpha-1B chain	14	0.488784
sp|Q02809|PLOD1_HUMAN	Procollagen-lysine,2-oxoglutarate 5-dioxygenase 1	2	0.490408
sp|P51659|DHB4_HUMAN	Peroxisomal multifunctional enzyme type 2	9	2.01855
tr|A0A087X0X3|A0A087X0X3_HUMAN	Heterogeneous nuclear ribonucleoprotein M	2	2.02026
sp|Q9BT09|CNPY3_HUMAN	Protein canopy homolog 3	1	2.02243
sp|P00367|DHE3_HUMAN	Glutamate dehydrogenase 1, mitochondrial	17	2.0434
sp|P27105|STOM_HUMAN	Erythrocyte band 7 integral membrane protein	5	2.04482
sp|Q9UMX5|NENF_HUMAN	Neudesin	1	2.07099
sp|Q14739|LBR_HUMAN	Lamin-B receptor	2	2.07469
sp|P62701|RS4X_HUMAN	40S ribosomal protein S4, X isoform	3	2.08209
sp|O14828|SCAM3_HUMAN	Secretory carrier-associated membrane protein 3	2	2.08492
sp|O75947|ATP5H_HUMAN	ATP synthase subunit d, mitochondrial	3	2.08673
sp|P21281|VATB2_HUMAN	V-type proton ATPase subunit B, brain isoform	5	2.09853
tr|J3QRS3|J3QRS3_HUMAN	Myosin regulatory light chain 12A	3	2.11644
sp|Q9NZT2|OGFR_HUMAN	Opioid growth factor receptor	2	2.13365
sp|Q6NUK1|SCMC1_HUMAN	Calcium-binding mitochondrial carrier protein SCaMC-1	2	2.13749
sp|Q00059|TFAM_HUMAN	Transcription factor A, mitochondrial	1	2.16029
tr|J3KMY5|J3KMY5_HUMAN	Epididymal secretory protein E1	4	2.17193
tr|B4DR61|B4DR61_HUMAN	Protein transport protein Sec61 subunit alpha isoform 1	1	2.19339
sp|Q9NR30|DDX21_HUMAN	Nucleolar RNA helicase 2	1	2.20177
sp|P13674|P4HA1_HUMAN	Prolyl 4-hydroxylase subunit alpha-1	3	2.2159
sp|P27695|APEX1_HUMAN	DNA-(apurinic or apyrimidinic site) lyase	2	2.23741
sp|P09622|DLDH_HUMAN	Dihydrolipoyl dehydrogenase, mitochondrial	7	2.25197
sp|P08648|ITA5_HUMAN	Integrin alpha-5	5	2.30564
tr|Q3LIE7|Q3LIE7_HUMAN	Delta(24)-sterol reductase	2	2.34054
sp|P46783|RS10_HUMAN	40S ribosomal protein S10	2	2.34155
tr|H0YEN5|H0YEN5_HUMAN	40S ribosomal protein S2 (Fragment)	2	2.34952
tr|A0A087WYR0|A0A087WYR0_HUMAN	Signal recognition particle 19 kDa protein	1	2.36083
sp|P05023|AT1A1_HUMAN	Sodium/potassium-transporting ATPase subunit alpha-1	14	2.39602
sp|P48047|ATPO_HUMAN	ATP synthase subunit O, mitochondrial	7	2.39652
sp|P63173|RL38_HUMAN	60S ribosomal protein L38	1	2.39698
tr|H3BS10|H3BS10_HUMAN	Beta-hexosaminidase	2	2.43543
sp|Q9BS26|ERP44_HUMAN	Endoplasmic reticulum resident protein 44	3	2.46766
sp|P62269|RS18_HUMAN	40S ribosomal protein S18	4	2.50119
sp|Q9NPJ3|ACO13_HUMAN	Acyl-coenzyme A thioesterase 13	1	2.52121
sp|Q9HAV0|GBB4_HUMAN	Guanine nucleotide-binding protein subunit beta-4	2	2.52637
sp|O00754|MA2B1_HUMAN	Lysosomal alpha-mannosidase	10	2.55966
sp|Q13423|NNTM_HUMAN	NAD(P) transhydrogenase, mitochondrial	11	2.60129
tr|A0A1B0GVD5|A0A1B0GVD5_HUMAN	Cathepsin D	9	2.63151
sp|Q9ULZ3|ASC_HUMAN	Apoptosis-associated speck-like protein containing a CARD	2	2.64495
tr|A8K878|A8K878_HUMAN	Mesencephalic astrocyte-derived neurotrophic factor	3	2.65338
sp|Q16186|ADRM1_HUMAN	Proteasomal ubiquitin receptor ADRM1	1	2.65373
tr|H3BNX8|H3BNX8_HUMAN	Cytochrome c oxidase subunit 5A, mitochondrial	3	2.66828
sp|Q15758|AAAT_HUMAN	Neutral amino acid transporter B(0)	5	2.69658
sp|P78324|SHPS1_HUMAN	Tyrosine-protein phosphatase non-receptor type substrate 1	1	2.74066
sp|P16150|LEUK_HUMAN	Leukosialin	3	2.74588
sp|P00505|AATM_HUMAN	Aspartate aminotransferase, mitochondrial	7	2.74849
sp|P22307|NLTP_HUMAN	Non-specific lipid-transfer protein	5	2.75382
sp|Q9UFN0|NPS3A_HUMAN	Protein NipSnap homolog 3A	2	2.77428
sp|Q71UI9|H2AV_HUMAN	Histone H2A.V	3	2.7755
sp|Q5JTV8|TOIP1_HUMAN	Torsin-1A-interacting protein 1	4	2.78237
sp|P18464|1B51_HUMAN	HLA class I histocompatibility antigen, B-51 alpha chain	7	2.81218
tr|A0A1W2PQY8|A0A1W2PQY8_HUMAN	NAD-dependent malic enzyme, mitochondrial	4	2.81384
sp|P61586|RHOA_HUMAN	Transforming protein RhoA	1	2.82803
sp|P21796|VDAC1_HUMAN	Voltage-dependent anion-selective channel protein 1	4	2.87444
sp|P30533|AMRP_HUMAN	Alpha-2-macroglobulin receptor-associated protein	1	2.97316
sp|A8MWD9|RUXGL_HUMAN	Putative small nuclear ribonucleoprotein G-like protein 15	1	2.97524
sp|P53634|CATC_HUMAN	Dipeptidyl peptidase 1	4	2.99097
sp|P08246|ELNE_HUMAN	Neutrophil elastase	3	2.99801
sp|P35232|PHB_HUMAN	Prohibitin	11	3.03429
tr|A8MXP9|A8MXP9_HUMAN	Matrin-3	2	3.09041
sp|O15427|MOT4_HUMAN	Monocarboxylate transporter 4	1	3.15101
sp|Q9BZZ2|SN_HUMAN	Sialoadhesin	1	3.15131
sp|P61160|ARP2_HUMAN	Actin-related protein 2	1	3.20853
sp|Q9UIQ6|LCAP_HUMAN	Leucyl-cystinyl aminopeptidase	1	3.21421
sp|P05107|ITB2_HUMAN	Integrin beta-2	9	3.22516
sp|Q6P2Q9|PRP8_HUMAN	Pre-mRNA-processing-splicing factor 8	1	3.25743
tr|J3KQ32|J3KQ32_HUMAN	Obg-like ATPase 1	2	3.2612
sp|Q9H3N1|TMX1_HUMAN	Thioredoxin-related transmembrane protein 1	5	3.27735
sp|P51149|RAB7A_HUMAN	Ras-related protein Rab-7a	10	3.29788
tr|E5RJU9|E5RJU9_HUMAN	Protein LYRIC	3	3.3046
tr|B9A067|B9A067_HUMAN	MIC	2	3.32412
tr|D6RFM5|D6RFM5_HUMAN	Succinate dehydrogenase [ubiquinone] flavoprotein subunit, mitochondrial	7	3.39253
tr|H0YNX5|H0YNX5_HUMAN	Signal peptidase complex catalytic subunit SEC11 (Fragment)	2	3.41317
sp|P69891|HBG1_HUMAN	Hemoglobin subunit gamma-1	1	3.43478
sp|P38646|GRP75_HUMAN	Stress-70 protein, mitochondrial	11	3.45207
sp|P36957|ODO2_HUMAN	Dihydrolipoyllysine-residue succinyltransferase component of 2-oxoglutarate dehydrogenase complex, mitochondrial	3	3.46359
sp|P61019|RAB2A_HUMAN	Ras-related protein Rab-2A	6	3.49729
tr|Q5T8U5|Q5T8U5_HUMAN	Surfeit 4	1	3.53078
sp|Q9UJZ1|STML2_HUMAN	Stomatin-like protein 2, mitochondrial	3	3.57562
sp|P62873|GBB1_HUMAN	Guanine nucleotide-binding protein G(I)/G(S)/G(T) subunit beta-1	9	3.57876
tr|K7ELL7|K7ELL7_HUMAN	Glucosidase 2 subunit beta	11	3.60165
tr|F8W8W4|F8W8W4_HUMAN	Prenylcysteine oxidase 1	2	3.62459
tr|J3KPX7|J3KPX7_HUMAN	Prohibitin-2	10	3.63207
sp|Q8NBS9|TXND5_HUMAN	Thioredoxin domain-containing protein 5	6	3.66227
sp|P12236|ADT3_HUMAN	ADP/ATP translocase 3	11	3.741
tr|A0A1B0GUH5|A0A1B0GUH5_HUMAN	Acid ceramidase	3	3.75694
sp|P30460|1B08_HUMAN	HLA class I histocompatibility antigen, B-8 alpha chain	8	3.77713
sp|O75629|CREG1_HUMAN	Protein CREG1	1	3.7885
sp|P11166|GTR1_HUMAN	Solute carrier family 2, facilitated glucose transporter member 1	2	3.79676
tr|K7EKL3|K7EKL3_HUMAN	Granulins (Fragment)	7	3.79926
sp|P40939|ECHA_HUMAN	Trifunctional enzyme subunit alpha, mitochondrial	25	3.84412
tr|E7EQ29|E7EQ29_HUMAN	Beta-galactosidase	6	3.84516
sp|P04040|CATA_HUMAN	Catalase	14	3.87388
sp|P34059|GALNS_HUMAN	N-acetylgalactosamine-6-sulfatase	1	3.9698
tr|A0A1W2PSE7|A0A1W2PSE7_HUMAN	HLA class I histocompatibility antigen, A-3 alpha chain	8	3.99959
sp|P14625|ENPL_HUMAN	Endoplasmin	27	4.07178
sp|Q14956|GPNMB_HUMAN	Transmembrane glycoprotein NMB	2	4.16076
sp|Q13011|ECH1_HUMAN	Delta(3,5)-Delta(2,4)-dienoyl-CoA isomerase, mitochondrial	10	4.27912
tr|E7EUY5|E7EUY5_HUMAN	Single-stranded DNA-binding protein, mitochondrial (Fragment)	3	4.29194
sp|P51571|SSRD_HUMAN	Translocon-associated protein subunit delta	5	4.3939
sp|Q14152|EIF3A_HUMAN	Eukaryotic translation initiation factor 3 subunit A	1	4.4174
sp|P60468|SC61B_HUMAN	Protein transport protein Sec61 subunit beta	1	4.47597
sp|P57088|TMM33_HUMAN	Transmembrane protein 33	3	4.51069
sp|Q14697|GANAB_HUMAN	Neutral alpha-glucosidase AB	13	4.57006
sp|P27797|CALR_HUMAN	Calreticulin	14	4.57514
sp|Q9Y277|VDAC3_HUMAN	Voltage-dependent anion-selective channel protein 3	2	4.58275
sp|P08758|ANXA5_HUMAN	Annexin A5	4	4.59715
sp|P08574|CY1_HUMAN	Cytochrome c1, heme protein, mitochondrial	5	4.60751
sp|P13073|COX41_HUMAN	Cytochrome c oxidase subunit 4 isoform 1, mitochondrial	1	4.61371
sp|Q9H2Y7|ZN106_HUMAN	Zinc finger protein 106	1	4.61964
tr|A0A0C4DGS1|A0A0C4DGS1_HUMAN	Dolichyl-diphosphooligosaccharide--protein glycosyltransferase 48 kDa subunit	7	4.66229
sp|P62277|RS13_HUMAN	40S ribosomal protein S13	3	4.67116
tr|A0A087X054|A0A087X054_HUMAN	Hypoxia up-regulated protein 1	9	4.67254
sp|Q16698|DECR_HUMAN	2,4-dienoyl-CoA reductase, mitochondrial	4	4.68662
sp|P62857|RS28_HUMAN	40S ribosomal protein S28	1	4.75383
sp|P30101|PDIA3_HUMAN	Protein disulfide-isomerase A3	26	4.85779
sp|P30040|ERP29_HUMAN	Endoplasmic reticulum resident protein 29	7	4.89493
sp|P15144|AMPN_HUMAN	Aminopeptidase N	16	5.04038
tr|M0R0R2|M0R0R2_HUMAN	40S ribosomal protein S5	1	5.2766
sp|P31937|3HIDH_HUMAN	3-hydroxyisobutyrate dehydrogenase, mitochondrial	5	5.32283
tr|E9PJ42|E9PJ42_HUMAN	Transmembrane protein 41B	1	5.37885
sp|P28907|CD38_HUMAN	ADP-ribosyl cyclase/cyclic ADP-ribose hydrolase 1	1	5.39018
sp|Q99442|SEC62_HUMAN	Translocation protein SEC62	1	5.3944
tr|M0QYN0|M0QYN0_HUMAN	Myeloid-derived growth factor	3	5.41091
sp|P23284|PPIB_HUMAN	Peptidyl-prolyl cis-trans isomerase B	13	5.53637
sp|P07237|PDIA1_HUMAN	Protein disulfide-isomerase	37	5.54589
sp|P11021|GRP78_HUMAN	78 kDa glucose-regulated protein	33	5.62751
sp|P31930|QCR1_HUMAN	Cytochrome b-c1 complex subunit 1, mitochondrial	10	5.6659
sp|P45880|VDAC2_HUMAN	Voltage-dependent anion-selective channel protein 2	3	5.69375
sp|P30049|ATPD_HUMAN	ATP synthase subunit delta, mitochondrial	2	5.69638
sp|Q9NSD9|SYFB_HUMAN	Phenylalanine--tRNA ligase beta subunit	1	5.95549
sp|P40926|MDHM_HUMAN	Malate dehydrogenase, mitochondrial	19	5.97777
tr|A0A087WUD3|A0A087WUD3_HUMAN	Oligosaccharyltransferase complex subunit	1	6.12045
sp|Q13162|PRDX4_HUMAN	Peroxiredoxin-4	7	6.12449
sp|P49755|TMEDA_HUMAN	Transmembrane emp24 domain-containing protein 10	4	6.25633
sp|P07919|QCR6_HUMAN	Cytochrome b-c1 complex subunit 6, mitochondrial	1	6.31618
sp|P13473|LAMP2_HUMAN	Lysosome-associated membrane glycoprotein 2	1	6.37919
sp|P07099|HYEP_HUMAN	Epoxide hydrolase 1	3	6.38978
tr|V9HW75|V9HW75_HUMAN	Epididymis secretory protein Li 109	4	6.41573
sp|P61626|LYSC_HUMAN	Lysozyme C	3	6.53425
sp|P30048|PRDX3_HUMAN	Thioredoxin-dependent peroxide reductase, mitochondrial	7	6.5391
sp|P11279|LAMP1_HUMAN	Lysosome-associated membrane glycoprotein 1	4	6.61011
sp|Q04941|PLP2_HUMAN	Proteolipid protein 2	2	6.67611
tr|E9PF18|E9PF18_HUMAN	Hydroxyacyl-coenzyme A dehydrogenase, mitochondrial	7	7.20854
sp|P23141|EST1_HUMAN	Liver carboxylesterase 1	27	7.22227
sp|Q15084|PDIA6_HUMAN	Protein disulfide-isomerase A6	15	7.42254
sp|P61026|RAB10_HUMAN	Ras-related protein Rab-10	3	7.43195
sp|O96005|CLPT1_HUMAN	Cleft lip and palate transmembrane protein 1	2	7.48988
sp|O00116|ADAS_HUMAN	Alkyldihydroxyacetonephosphate synthase, peroxisomal	7	7.51118
sp|P61604|CH10_HUMAN	10 kDa heat shock protein, mitochondrial	11	7.76356
sp|P25705|ATPA_HUMAN	ATP synthase subunit alpha, mitochondrial	23	8.09464
sp|Q96AG4|LRC59_HUMAN	Leucine-rich repeat-containing protein 59	7	8.10912
sp|P69905|HBA_HUMAN	Hemoglobin subunit alpha	3	8.26382
sp|O75477|ERLN1_HUMAN	Erlin-1	5	8.4505
sp|P48960|CD97_HUMAN	CD97 antigen	4	8.54721
sp|P46977|STT3A_HUMAN	Dolichyl-diphosphooligosaccharide--protein glycosyltransferase subunit STT3A	5	8.8393
sp|P54709|AT1B3_HUMAN	Sodium/potassium-transporting ATPase subunit beta-3	1	8.91997
sp|P16615|AT2A2_HUMAN	Sarcoplasmic/endoplasmic reticulum calcium ATPase 2	2	9.08804
sp|P10809|CH60_HUMAN	60 kDa heat shock protein, mitochondrial	39	9.37031
sp|Q92575|UBXN4_HUMAN	UBX domain-containing protein 4	1	9.46117
sp|P04843|RPN1_HUMAN	Dolichyl-diphosphooligosaccharide--protein glycosyltransferase subunit 1	17	10.205
sp|Q8TCJ2|STT3B_HUMAN	Dolichyl-diphosphooligosaccharide--protein glycosyltransferase subunit STT3B	4	10.838
sp|P16070|CD44_HUMAN	CD44 antigen	4	11.1049
tr|J3KN36|J3KN36_HUMAN	Nodal modulator 3	6	12.2653
sp|P20645|MPRD_HUMAN	Cation-dependent mannose-6-phosphate receptor	2	12.9139
sp|P78527|PRKDC_HUMAN	DNA-dependent protein kinase catalytic subunit	1	13.3469
sp|Q9HDC9|APMAP_HUMAN	Adipocyte plasma membrane-associated protein	6	13.5486
sp|P06576|ATPB_HUMAN	ATP synthase subunit beta, mitochondrial	24	14.8375
sp|P22695|QCR2_HUMAN	Cytochrome b-c1 complex subunit 2, mitochondrial	6	15.0774
sp|P04844|RPN2_HUMAN	Dolichyl-diphosphooligosaccharide--protein glycosyltransferase subunit 2	14	15.5548
sp|P05141|ADT2_HUMAN	ADP/ATP translocase 2	12	15.6667
tr|A0A087WUV8|A0A087WUV8_HUMAN	Basigin	6	15.668
tr|F8VVM2|F8VVM2_HUMAN	Phosphate carrier protein, mitochondrial	6	15.6756
sp|P61224|RAP1B_HUMAN	Ras-related protein Rap-1b	2	16.6257
sp|P27824|CALX_HUMAN	Calnexin	7	18.2336
sp|P61006|RAB8A_HUMAN	Ras-related protein Rab-8A	3	19.2124
sp|P00414|COX3_HUMAN	Cytochrome c oxidase subunit 3	1	23.2042
sp|P50416|CPT1A_HUMAN	Carnitine O-palmitoyltransferase 1, liver isoform	4	31.8723
tr|J9JIE6|J9JIE6_HUMAN	Calcium load-activated calcium channel	1	66.9559
tr|Q9UFM8|Q9UFM8_HUMAN	Neuroplastin (Fragment)	3	66.9559
tr|Q5VV89|Q5VV89_HUMAN	Microsomal glutathione S-transferase 3	3	66.9559
tr|G3V325|G3V325_HUMAN	ATP5J2-PTCD1 readthrough	2	66.9559
sp|O15127|SCAM2_HUMAN	Secretory carrier-associated membrane protein 2	2	66.9559
tr|U3KPS2|U3KPS2_HUMAN	Myeloblastin	1	66.9559
tr|D6RIZ4|D6RIZ4_HUMAN	Major facilitator superfamily domain-containing protein 10	1	66.9559
tr|F6SFZ6|F6SFZ6_HUMAN	P2X purinoceptor 4	1	66.9559
sp|O00592|PODXL_HUMAN	Podocalyxin	1	66.9559
sp|P07954|FUMH_HUMAN	Fumarate hydratase, mitochondrial	6	66.9559

## Sheet: no DEPs
Accession	Name	Peptides(95%)	H:L
tr|A0A087WTP3|A0A087WTP3_HUMAN	Far upstream element-binding protein 2 OS=Homo sapiens GN=KHSRP PE=1 SV=1	3	0.501963
sp|O00115|DNS2A_HUMAN	Deoxyribonuclease-2-alpha OS=Homo sapiens GN=DNASE2 PE=1 SV=2	1	0.502004
sp|P31146|COR1A_HUMAN	Coronin-1A OS=Homo sapiens GN=CORO1A PE=1 SV=4	10	0.504439
sp|P62937|PPIA_HUMAN	Peptidyl-prolyl cis-trans isomerase A OS=Homo sapiens GN=PPIA PE=1 SV=2	11	0.504758
sp|P68036|UB2L3_HUMAN	Ubiquitin-conjugating enzyme E2 L3 OS=Homo sapiens GN=UBE2L3 PE=1 SV=1	1	0.518508
tr|J3KMX3|J3KMX3_HUMAN	Alpha-fetoprotein OS=Homo sapiens GN=AFP PE=1 SV=1	2	0.524203
sp|Q12931|TRAP1_HUMAN	Heat shock protein 75 kDa, mitochondrial OS=Homo sapiens GN=TRAP1 PE=1 SV=3	2	0.536242
tr|H3BRU6|H3BRU6_HUMAN	Poly(rC)-binding protein 2 (Fragment) OS=Homo sapiens GN=PCBP2 PE=1 SV=1	3	0.538367
tr|H0Y7A7|H0Y7A7_HUMAN	Calmodulin-2 (Fragment) OS=Homo sapiens GN=CALM2 PE=1 SV=1	2	0.541173
tr|C9J3F6|C9J3F6_HUMAN	TBC1 domain family member 5 OS=Homo sapiens GN=TBC1D5 PE=1 SV=1	1	0.543062
sp|P54727|RD23B_HUMAN	UV excision repair protein RAD23 homolog B OS=Homo sapiens GN=RAD23B PE=1 SV=1	1	0.543149
sp|Q7KZF4|SND1_HUMAN	Staphylococcal nuclease domain-containing protein 1 OS=Homo sapiens GN=SND1 PE=1 SV=1	2	0.546048
tr|A2A274|A2A274_HUMAN	Aconitate hydratase, mitochondrial OS=Homo sapiens GN=ACO2 PE=1 SV=1	7	0.548134
sp|P18669|PGAM1_HUMAN	Phosphoglycerate mutase 1 OS=Homo sapiens GN=PGAM1 PE=1 SV=2	10	0.553147
tr|A6NJA2|A6NJA2_HUMAN	Ubiquitin carboxyl-terminal hydrolase 14 OS=Homo sapiens GN=USP14 PE=1 SV=2	1	0.553569
tr|H0Y8D1|H0Y8D1_HUMAN	Trypsin-1 (Fragment) OS=Homo sapiens GN=PRSS1 PE=1 SV=1	1	0.554931
sp|P62241|RS8_HUMAN	40S ribosomal protein S8 OS=Homo sapiens GN=RPS8 PE=1 SV=2	5	0.559784
sp|P35659|DEK_HUMAN	Protein DEK OS=Homo sapiens GN=DEK PE=1 SV=1	1	0.560098
sp|P67936|TPM4_HUMAN	Tropomyosin alpha-4 chain OS=Homo sapiens GN=TPM4 PE=1 SV=3	8	0.563891
tr|K7ER00|K7ER00_HUMAN	Phenylalanine--tRNA ligase alpha subunit OS=Homo sapiens GN=FARSA PE=1 SV=1	1	0.565535
tr|E7EUC7|E7EUC7_HUMAN	UTP--glucose-1-phosphate uridylyltransferase OS=Homo sapiens GN=UGP2 PE=1 SV=1	4	0.576357
sp|O75643|U520_HUMAN	U5 small nuclear ribonucleoprotein 200 kDa helicase OS=Homo sapiens GN=SNRNP200 PE=1 SV=2	3	0.577463
sp|P14866|HNRPL_HUMAN	Heterogeneous nuclear ribonucleoprotein L OS=Homo sapiens GN=HNRNPL PE=1 SV=2	4	0.577537
tr|F6RFD5|F6RFD5_HUMAN	Destrin OS=Homo sapiens GN=DSTN PE=1 SV=1	1	0.581663
sp|P24534|EF1B_HUMAN	Elongation factor 1-beta OS=Homo sapiens GN=EEF1B2 PE=1 SV=3	1	0.583073
sp|Q8N257|H2B3B_HUMAN	Histone H2B type 3-B OS=Homo sapiens GN=HIST3H2BB PE=1 SV=3	6	0.591295
sp|P19338|NUCL_HUMAN	Nucleolin OS=Homo sapiens GN=NCL PE=1 SV=3	7	0.591856
sp|O75381|PEX14_HUMAN	Peroxisomal membrane protein PEX14 OS=Homo sapiens GN=PEX14 PE=1 SV=1	1	0.592638
sp|P26641|EF1G_HUMAN	Elongation factor 1-gamma OS=Homo sapiens GN=EEF1G PE=1 SV=3	5	0.596667
tr|H0Y4R1|H0Y4R1_HUMAN	Inosine-5'-monophosphate dehydrogenase 2 (Fragment) OS=Homo sapiens GN=IMPDH2 PE=1 SV=1	3	0.598746
sp|P30041|PRDX6_HUMAN	Peroxiredoxin-6 OS=Homo sapiens GN=PRDX6 PE=1 SV=3	3	0.59942
sp|O75367|H2AY_HUMAN	Core histone macro-H2A.1 OS=Homo sapiens GN=H2AFY PE=1 SV=4	5	0.599995
tr|A0A0A0MT01|A0A0A0MT01_HUMAN	Gelsolin OS=Homo sapiens GN=GSN PE=1 SV=1	2	0.600556
sp|O00479|HMGN4_HUMAN	High mobility group nucleosome-binding domain-containing protein 4 OS=Homo sapiens GN=HMGN4 PE=1 SV=3	2	0.60204
sp|P16403|H12_HUMAN	Histone H1.2 OS=Homo sapiens GN=HIST1H1C PE=1 SV=2	8	0.602515
sp|P13489|RINI_HUMAN	Ribonuclease inhibitor OS=Homo sapiens GN=RNH1 PE=1 SV=2	5	0.605083
sp|P11387|TOP1_HUMAN	DNA topoisomerase 1 OS=Homo sapiens GN=TOP1 PE=1 SV=2	3	0.605289
sp|P27348|1433T_HUMAN	14-3-3 protein theta OS=Homo sapiens GN=YWHAQ PE=1 SV=1	5	0.60816
tr|C9J0K6|C9J0K6_HUMAN	Sorcin OS=Homo sapiens GN=SRI PE=1 SV=1	1	0.612342
tr|U3KQK0|U3KQK0_HUMAN	Histone H2B OS=Homo sapiens GN=HIST1H2BN PE=1 SV=1	6	0.612343
sp|P46940|IQGA1_HUMAN	Ras GTPase-activating-like protein IQGAP1 OS=Homo sapiens GN=IQGAP1 PE=1 SV=1	12	0.613765
sp|P34897|GLYM_HUMAN	Serine hydroxymethyltransferase, mitochondrial OS=Homo sapiens GN=SHMT2 PE=1 SV=3	1	0.616713
sp|P16401|H15_HUMAN	Histone H1.5 OS=Homo sapiens GN=HIST1H1B PE=1 SV=3	6	0.617205
sp|P17096|HMGA1_HUMAN	High mobility group protein HMG-I/HMG-Y OS=Homo sapiens GN=HMGA1 PE=1 SV=3	2	0.622803
sp|O00410|IPO5_HUMAN	Importin-5 OS=Homo sapiens GN=IPO5 PE=1 SV=4	5	0.629867
sp|P49711|CTCF_HUMAN	Transcriptional repressor CTCF OS=Homo sapiens GN=CTCF PE=1 SV=1	1	0.631042
sp|O15511|ARPC5_HUMAN	Actin-related protein 2/3 complex subunit 5 OS=Homo sapiens GN=ARPC5 PE=1 SV=3	1	0.633597
sp|P62633|CNBP_HUMAN	Cellular nucleic acid-binding protein OS=Homo sapiens GN=CNBP PE=1 SV=1	1	0.633822
sp|P18206|VINC_HUMAN	Vinculin OS=Homo sapiens GN=VCL PE=1 SV=4	9	0.636816
sp|P30044|PRDX5_HUMAN	Peroxiredoxin-5, mitochondrial OS=Homo sapiens GN=PRDX5 PE=1 SV=4	2	0.636956
tr|A0A0C4DFU2|A0A0C4DFU2_HUMAN	Superoxide dismutase OS=Homo sapiens GN=SOD2 PE=1 SV=1	3	0.637247
tr|K7EK33|K7EK33_HUMAN	DAZ-associated protein 1 OS=Homo sapiens GN=DAZAP1 PE=1 SV=2	1	0.650613
sp|Q04760|LGUL_HUMAN	Lactoylglutathione lyase OS=Homo sapiens GN=GLO1 PE=1 SV=4	2	0.652213
sp|P09972|ALDOC_HUMAN	Fructose-bisphosphate aldolase C OS=Homo sapiens GN=ALDOC PE=1 SV=2	6	0.652869
sp|P00558|PGK1_HUMAN	Phosphoglycerate kinase 1 OS=Homo sapiens GN=PGK1 PE=1 SV=3	21	0.653831
sp|P13010|XRCC5_HUMAN	X-ray repair cross-complementing protein 5 OS=Homo sapiens GN=XRCC5 PE=1 SV=3	6	0.653847
sp|Q09666|AHNK_HUMAN	Neuroblast differentiation-associated protein AHNAK OS=Homo sapiens GN=AHNAK PE=1 SV=2	2	0.662755
tr|G5E9W8|G5E9W8_HUMAN	Glycogenin 1, isoform CRA_e OS=Homo sapiens GN=GYG1 PE=1 SV=1	2	0.663391
sp|Q15075|EEA1_HUMAN	Early endosome antigen 1 OS=Homo sapiens GN=EEA1 PE=1 SV=2	1	0.665759
sp|Q15029|U5S1_HUMAN	116 kDa U5 small nuclear ribonucleoprotein component OS=Homo sapiens GN=EFTUD2 PE=1 SV=1	2	0.667391
sp|P16930|FAAA_HUMAN	Fumarylacetoacetase OS=Homo sapiens GN=FAH PE=1 SV=2	6	0.670021
sp|P41250|GARS_HUMAN	Glycine--tRNA ligase OS=Homo sapiens GN=GARS PE=1 SV=3	3	0.679293
sp|P48643|TCPE_HUMAN	T-complex protein 1 subunit epsilon OS=Homo sapiens GN=CCT5 PE=1 SV=1	7	0.679541
sp|P25786|PSA1_HUMAN	Proteasome subunit alpha type-1 OS=Homo sapiens GN=PSMA1 PE=1 SV=1	4	0.681358
sp|P15848|ARSB_HUMAN	Arylsulfatase B OS=Homo sapiens GN=ARSB PE=1 SV=1	1	0.682851
tr|A0A0U1RRH7|A0A0U1RRH7_HUMAN	Histone H2A OS=Homo sapiens GN=HIST1H3D PE=3 SV=1	6	0.685633
tr|E9PR30|E9PR30_HUMAN	40S ribosomal protein S30 OS=Homo sapiens GN=FAU PE=1 SV=1	1	0.688969
sp|Q99832|TCPH_HUMAN	T-complex protein 1 subunit eta OS=Homo sapiens GN=CCT7 PE=1 SV=2	5	0.689732
sp|P05455|LA_HUMAN	Lupus La protein OS=Homo sapiens GN=SSB PE=1 SV=2	5	0.690933
sp|Q15365|PCBP1_HUMAN	Poly(rC)-binding protein 1 OS=Homo sapiens GN=PCBP1 PE=1 SV=2	6	0.694083
sp|P61978|HNRPK_HUMAN	Heterogeneous nuclear ribonucleoprotein K OS=Homo sapiens GN=HNRNPK PE=1 SV=1	8	0.694298
sp|P62993|GRB2_HUMAN	Growth factor receptor-bound protein 2 OS=Homo sapiens GN=GRB2 PE=1 SV=1	1	0.699097
sp|Q09028|RBBP4_HUMAN	Histone-binding protein RBBP4 OS=Homo sapiens GN=RBBP4 PE=1 SV=3	3	0.70093
sp|O60506|HNRPQ_HUMAN	Heterogeneous nuclear ribonucleoprotein Q OS=Homo sapiens GN=SYNCRIP PE=1 SV=2	8	0.704133
sp|Q8IXB1|DJC10_HUMAN	DnaJ homolog subfamily C member 10 OS=Homo sapiens GN=DNAJC10 PE=1 SV=2	1	0.708633
sp|O75746|CMC1_HUMAN	Calcium-binding mitochondrial carrier protein Aralar1 OS=Homo sapiens GN=SLC25A12 PE=1 SV=2	12	0.70887
sp|P12081|SYHC_HUMAN	Histidine--tRNA ligase, cytoplasmic OS=Homo sapiens GN=HARS PE=1 SV=2	1	0.71073
sp|Q92597|NDRG1_HUMAN	Protein NDRG1 OS=Homo sapiens GN=NDRG1 PE=1 SV=1	3	0.714384
sp|P48735|IDHP_HUMAN	Isocitrate dehydrogenase [NADP], mitochondrial OS=Homo sapiens GN=IDH2 PE=1 SV=2	1	0.716266
sp|P07355|ANXA2_HUMAN	Annexin A2 OS=Homo sapiens GN=ANXA2 PE=1 SV=2	17	0.720104
tr|A0A140T936|A0A140T936_HUMAN	Valine--tRNA ligase (Fragment) OS=Homo sapiens GN=VARS PE=1 SV=1	3	0.720236
sp|P05362|ICAM1_HUMAN	Intercellular adhesion molecule 1 OS=Homo sapiens GN=ICAM1 PE=1 SV=2	2	0.720487
sp|Q8WW12|PCNP_HUMAN	PEST proteolytic signal-containing nuclear protein OS=Homo sapiens GN=PCNP PE=1 SV=2	3	0.723392
sp|P10599|THIO_HUMAN	Thioredoxin OS=Homo sapiens GN=TXN PE=1 SV=3	3	0.725613
sp|P40121|CAPG_HUMAN	Macrophage-capping protein OS=Homo sapiens GN=CAPG PE=1 SV=2	7	0.732292
tr|E7ERS3|E7ERS3_HUMAN	Zinc finger CCCH domain-containing protein 18 OS=Homo sapiens GN=ZC3H18 PE=1 SV=1	1	0.73393
tr|E7EVA0|E7EVA0_HUMAN	Microtubule-associated protein OS=Homo sapiens GN=MAP4 PE=1 SV=1	4	0.734338
tr|Q5W0H4|Q5W0H4_HUMAN	Translationally-controlled tumor protein OS=Homo sapiens GN=TPT1 PE=1 SV=1	2	0.737801
tr|I3L504|I3L504_HUMAN	Eukaryotic translation initiation factor 5A-1 OS=Homo sapiens GN=EIF5A PE=1 SV=1	1	0.73946
sp|P05204|HMGN2_HUMAN	Non-histone chromosomal protein HMG-17 OS=Homo sapiens GN=HMGN2 PE=1 SV=3	6	0.741481
sp|P07900|HS90A_HUMAN	Heat shock protein HSP 90-alpha OS=Homo sapiens GN=HSP90AA1 PE=1 SV=5	17	0.74368
sp|P07737|PROF1_HUMAN	Profilin-1 OS=Homo sapiens GN=PFN1 PE=1 SV=2	10	0.744151
sp|Q15181|IPYR_HUMAN	Inorganic pyrophosphatase OS=Homo sapiens GN=PPA1 PE=1 SV=2	3	0.744177
sp|P50990|TCPQ_HUMAN	T-complex protein 1 subunit theta OS=Homo sapiens GN=CCT8 PE=1 SV=4	12	0.747478
sp|Q8TEM1|PO210_HUMAN	Nuclear pore membrane glycoprotein 210 OS=Homo sapiens GN=NUP210 PE=1 SV=3	2	0.747884
sp|P53999|TCP4_HUMAN	Activated RNA polymerase II transcriptional coactivator p15 OS=Homo sapiens GN=SUB1 PE=1 SV=3	6	0.74798
sp|P63261|ACTG_HUMAN	Actin, cytoplasmic 2 OS=Homo sapiens GN=ACTG1 PE=1 SV=1	23	0.749064
sp|Q7Z4V5|HDGR2_HUMAN	Hepatoma-derived growth factor-related protein 2 OS=Homo sapiens GN=HDGFL2 PE=1 SV=1	1	0.749312
tr|G3V1A4|G3V1A4_HUMAN	Cofilin 1 (Non-muscle), isoform CRA_a OS=Homo sapiens GN=CFL1 PE=1 SV=1	5	0.751504
sp|P20618|PSB1_HUMAN	Proteasome subunit beta type-1 OS=Homo sapiens GN=PSMB1 PE=1 SV=2	4	0.752828
sp|P04083|ANXA1_HUMAN	Annexin A1 OS=Homo sapiens GN=ANXA1 PE=1 SV=2	16	0.752909
sp|P63104|1433Z_HUMAN	14-3-3 protein zeta/delta OS=Homo sapiens GN=YWHAZ PE=1 SV=1	9	0.7536
sp|Q7Z2W4|ZCCHV_HUMAN	Zinc finger CCCH-type antiviral protein 1 OS=Homo sapiens GN=ZC3HAV1 PE=1 SV=3	3	0.754276
sp|P62820|RAB1A_HUMAN	Ras-related protein Rab-1A OS=Homo sapiens GN=RAB1A PE=1 SV=3	2	0.756461
tr|X1WI28|X1WI28_HUMAN	60S ribosomal protein L10 (Fragment) OS=Homo sapiens GN=RPL10 PE=1 SV=7	1	0.758049
sp|P17987|TCPA_HUMAN	T-complex protein 1 subunit alpha OS=Homo sapiens GN=TCP1 PE=1 SV=1	6	0.758219
sp|Q13185|CBX3_HUMAN	Chromobox protein homolog 3 OS=Homo sapiens GN=CBX3 PE=1 SV=4	2	0.759842
sp|P40227|TCPZ_HUMAN	T-complex protein 1 subunit zeta OS=Homo sapiens GN=CCT6A PE=1 SV=3	5	0.760478
sp|P10768|ESTD_HUMAN	S-formylglutathione hydrolase OS=Homo sapiens GN=ESD PE=1 SV=2	4	0.761084
sp|Q92542|NICA_HUMAN	Nicastrin OS=Homo sapiens GN=NCSTN PE=1 SV=2	1	0.762295
sp|P50995|ANX11_HUMAN	Annexin A11 OS=Homo sapiens GN=ANXA11 PE=1 SV=1	3	0.763571
sp|Q9NR45|SIAS_HUMAN	Sialic acid synthase OS=Homo sapiens GN=NANS PE=1 SV=2	1	0.766644
sp|P31946|1433B_HUMAN	14-3-3 protein beta/alpha OS=Homo sapiens GN=YWHAB PE=1 SV=3	6	0.768561
sp|Q8WUM4|PDC6I_HUMAN	Programmed cell death 6-interacting protein OS=Homo sapiens GN=PDCD6IP PE=1 SV=1	5	0.770588
sp|P28838|AMPL_HUMAN	Cytosol aminopeptidase OS=Homo sapiens GN=LAP3 PE=1 SV=3	12	0.772315
sp|Q5JXB2|UE2NL_HUMAN	Putative ubiquitin-conjugating enzyme E2 N-like OS=Homo sapiens GN=UBE2NL PE=1 SV=1	1	0.776823
sp|Q9UQ35|SRRM2_HUMAN	Serine/arginine repetitive matrix protein 2 OS=Homo sapiens GN=SRRM2 PE=1 SV=2	1	0.777699
sp|O15067|PUR4_HUMAN	Phosphoribosylformylglycinamidine synthase OS=Homo sapiens GN=PFAS PE=1 SV=4	1	0.780016
sp|P61956|SUMO2_HUMAN	Small ubiquitin-related modifier 2 OS=Homo sapiens GN=SUMO2 PE=1 SV=3	1	0.781737
tr|Q5SZU1|Q5SZU1_HUMAN	D-3-phosphoglycerate dehydrogenase OS=Homo sapiens GN=PHGDH PE=1 SV=1	2	0.782649
sp|P31350|RIR2_HUMAN	Ribonucleoside-diphosphate reductase subunit M2 OS=Homo sapiens GN=RRM2 PE=1 SV=1	1	0.785115
sp|P07814|SYEP_HUMAN	Bifunctional glutamate/proline--tRNA ligase OS=Homo sapiens GN=EPRS PE=1 SV=5	5	0.793087
tr|A2ACR1|A2ACR1_HUMAN	Proteasome subunit beta type OS=Homo sapiens GN=PSMB9 PE=1 SV=1	1	0.793702
sp|P50991|TCPD_HUMAN	T-complex protein 1 subunit delta OS=Homo sapiens GN=CCT4 PE=1 SV=4	4	0.794773
sp|O75368|SH3L1_HUMAN	SH3 domain-binding glutamic acid-rich-like protein OS=Homo sapiens GN=SH3BGRL PE=1 SV=1	3	0.798709
sp|Q9Y490|TLN1_HUMAN	Talin-1 OS=Homo sapiens GN=TLN1 PE=1 SV=3	17	0.800232
sp|P41091|IF2G_HUMAN	Eukaryotic translation initiation factor 2 subunit 3 OS=Homo sapiens GN=EIF2S3 PE=1 SV=3	2	0.802803
tr|Q5T6H7|Q5T6H7_HUMAN	Xaa-Pro aminopeptidase 1 OS=Homo sapiens GN=XPNPEP1 PE=1 SV=1	1	0.803736
sp|Q9BVC6|TM109_HUMAN	Transmembrane protein 109 OS=Homo sapiens GN=TMEM109 PE=1 SV=1	1	0.803953
sp|P62316|SMD2_HUMAN	Small nuclear ribonucleoprotein Sm D2 OS=Homo sapiens GN=SNRPD2 PE=1 SV=1	2	0.805539
sp|P49247|RPIA_HUMAN	Ribose-5-phosphate isomerase OS=Homo sapiens GN=RPIA PE=1 SV=3	2	0.808573
tr|J3KQ96|J3KQ96_HUMAN	Treacle protein (Fragment) OS=Homo sapiens GN=TCOF1 PE=1 SV=1	1	0.809963
sp|P62318|SMD3_HUMAN	Small nuclear ribonucleoprotein Sm D3 OS=Homo sapiens GN=SNRPD3 PE=1 SV=1	2	0.811235
sp|O75369|FLNB_HUMAN	Filamin-B OS=Homo sapiens GN=FLNB PE=1 SV=2	1	0.812994
sp|P56537|IF6_HUMAN	Eukaryotic translation initiation factor 6 OS=Homo sapiens GN=EIF6 PE=1 SV=1	3	0.814349
sp|Q01469|FABP5_HUMAN	Fatty acid-binding protein, epidermal OS=Homo sapiens GN=FABP5 PE=1 SV=3	7	0.814607
tr|A0A087WZ27|A0A087WZ27_HUMAN	Zinc finger protein 90 OS=Homo sapiens GN=ZNF90 PE=4 SV=2	3	0.81655
tr|Q3KNR6|Q3KNR6_HUMAN	Hsc70-interacting protein OS=Homo sapiens GN=ST13 PE=1 SV=1	3	0.816593
tr|A6NKB8|A6NKB8_HUMAN	Aminopeptidase B OS=Homo sapiens GN=RNPEP PE=1 SV=1	2	0.819015
sp|P60866|RS20_HUMAN	40S ribosomal protein S20 OS=Homo sapiens GN=RPS20 PE=1 SV=1	2	0.820858
sp|P78417|GSTO1_HUMAN	Glutathione S-transferase omega-1 OS=Homo sapiens GN=GSTO1 PE=1 SV=2	5	0.822045
sp|Q9UQ80|PA2G4_HUMAN	Proliferation-associated protein 2G4 OS=Homo sapiens GN=PA2G4 PE=1 SV=3	3	0.822421
sp|P49748|ACADV_HUMAN	Very long-chain specific acyl-CoA dehydrogenase, mitochondrial OS=Homo sapiens GN=ACADVL PE=1 SV=1	7	0.825329
sp|P49368|TCPG_HUMAN	T-complex protein 1 subunit gamma OS=Homo sapiens GN=CCT3 PE=1 SV=4	6	0.826848
tr|A0A087X027|A0A087X027_HUMAN	Protein SETSIP OS=Homo sapiens GN=SETSIP PE=3 SV=1	3	0.830367
sp|Q9P258|RCC2_HUMAN	Protein RCC2 OS=Homo sapiens GN=RCC2 PE=1 SV=2	3	0.831175
tr|D6RD18|D6RD18_HUMAN	Heterogeneous nuclear ribonucleoprotein A/B OS=Homo sapiens GN=HNRNPAB PE=1 SV=1	5	0.831898
sp|P62263|RS14_HUMAN	40S ribosomal protein S14 OS=Homo sapiens GN=RPS14 PE=1 SV=3	5	0.833474
sp|Q9P0L0|VAPA_HUMAN	Vesicle-associated membrane protein-associated protein A OS=Homo sapiens GN=VAPA PE=1 SV=3	3	0.833867
sp|Q15717|ELAV1_HUMAN	ELAV-like protein 1 OS=Homo sapiens GN=ELAVL1 PE=1 SV=2	2	0.836247
tr|H3BPE7|H3BPE7_HUMAN	RNA-binding protein FUS OS=Homo sapiens GN=FUS PE=1 SV=1	2	0.839337
sp|P02545|LMNA_HUMAN	Prelamin-A/C OS=Homo sapiens GN=LMNA PE=1 SV=1	16	0.842381
sp|Q5SSJ5|HP1B3_HUMAN	Heterochromatin protein 1-binding protein 3 OS=Homo sapiens GN=HP1BP3 PE=1 SV=1	1	0.843158
sp|P61158|ARP3_HUMAN	Actin-related protein 3 OS=Homo sapiens GN=ACTR3 PE=1 SV=3	3	0.843857
sp|Q9UHV9|PFD2_HUMAN	Prefoldin subunit 2 OS=Homo sapiens GN=PFDN2 PE=1 SV=1	1	0.844248
tr|A8MUD9|A8MUD9_HUMAN	60S ribosomal protein L7 OS=Homo sapiens GN=RPL7 PE=1 SV=1	4	0.844375
sp|O75874|IDHC_HUMAN	Isocitrate dehydrogenase [NADP] cytoplasmic OS=Homo sapiens GN=IDH1 PE=1 SV=2	6	0.849687
tr|H7C2G3|H7C2G3_HUMAN	ES1 protein homolog, mitochondrial (Fragment) OS=Homo sapiens GN=C21orf33 PE=4 SV=1	1	0.852612
sp|P14174|MIF_HUMAN	Macrophage migration inhibitory factor OS=Homo sapiens GN=MIF PE=1 SV=4	1	0.855517
sp|Q92688|AN32B_HUMAN	Acidic leucine-rich nuclear phosphoprotein 32 family member B OS=Homo sapiens GN=ANP32B PE=1 SV=1	4	0.85686
sp|Q02790|FKBP4_HUMAN	Peptidyl-prolyl cis-trans isomerase FKBP4 OS=Homo sapiens GN=FKBP4 PE=1 SV=3	4	0.857194
tr|A0A087WWU8|A0A087WWU8_HUMAN	Tropomyosin alpha-3 chain OS=Homo sapiens GN=TPM3 PE=1 SV=1	7	0.860206
tr|E9PQN2|E9PQN2_HUMAN	Bcl-2-associated transcription factor 1 OS=Homo sapiens GN=BCLAF1 PE=1 SV=1	1	0.861964
sp|P26583|HMGB2_HUMAN	High mobility group protein B2 OS=Homo sapiens GN=HMGB2 PE=1 SV=2	6	0.866369
sp|P01024|CO3_HUMAN	Complement C3 OS=Homo sapiens GN=C3 PE=1 SV=2	1	0.867601
sp|P30740|ILEU_HUMAN	Leukocyte elastase inhibitor OS=Homo sapiens GN=SERPINB1 PE=1 SV=1	2	0.867623
sp|P20701|ITAL_HUMAN	Integrin alpha-L OS=Homo sapiens GN=ITGAL PE=1 SV=3	3	0.871732
sp|Q02880|TOP2B_HUMAN	DNA topoisomerase 2-beta OS=Homo sapiens GN=TOP2B PE=1 SV=3	8	0.873308
sp|P30086|PEBP1_HUMAN	Phosphatidylethanolamine-binding protein 1 OS=Homo sapiens GN=PEBP1 PE=1 SV=3	2	0.873934
tr|Q8WVC2|Q8WVC2_HUMAN	40S ribosomal protein S21 OS=Homo sapiens GN=RPS21 PE=1 SV=1	2	0.878959
tr|J3QQX2|J3QQX2_HUMAN	Rho GDP-dissociation inhibitor 1 OS=Homo sapiens GN=ARHGDIA PE=1 SV=1	3	0.881992
sp|P35579|MYH9_HUMAN	Myosin-9 OS=Homo sapiens GN=MYH9 PE=1 SV=4	25	0.88343
sp|O43852|CALU_HUMAN	Calumenin OS=Homo sapiens GN=CALU PE=1 SV=2	1	0.885046
sp|Q9UL46|PSME2_HUMAN	Proteasome activator complex subunit 2 OS=Homo sapiens GN=PSME2 PE=1 SV=4	6	0.8875
sp|P39023|RL3_HUMAN	60S ribosomal protein L3 OS=Homo sapiens GN=RPL3 PE=1 SV=2	2	0.887611
sp|Q9UI08|EVL_HUMAN	Ena/VASP-like protein OS=Homo sapiens GN=EVL PE=1 SV=2	1	0.887643
sp|P38159|RBMX_HUMAN	RNA-binding motif protein, X chromosome OS=Homo sapiens GN=RBMX PE=1 SV=3	2	0.889305
sp|Q15555|MARE2_HUMAN	Microtubule-associated protein RP/EB family member 2 OS=Homo sapiens GN=MAPRE2 PE=1 SV=1	1	0.892365
sp|P20042|IF2B_HUMAN	Eukaryotic translation initiation factor 2 subunit 2 OS=Homo sapiens GN=EIF2S2 PE=1 SV=2	1	0.895481
sp|Q32MZ4|LRRF1_HUMAN	Leucine-rich repeat flightless-interacting protein 1 OS=Homo sapiens GN=LRRFIP1 PE=1 SV=2	1	0.898013
tr|H7C2W9|H7C2W9_HUMAN	60S ribosomal protein L31 (Fragment) OS=Homo sapiens GN=RPL31 PE=1 SV=1	1	0.898999
sp|Q9NYU2|UGGG1_HUMAN	UDP-glucose:glycoprotein glucosyltransferase 1 OS=Homo sapiens GN=UGGT1 PE=1 SV=3	10	0.899904
sp|P25788|PSA3_HUMAN	Proteasome subunit alpha type-3 OS=Homo sapiens GN=PSMA3 PE=1 SV=2	2	0.901662
sp|P51858|HDGF_HUMAN	Hepatoma-derived growth factor OS=Homo sapiens GN=HDGF PE=1 SV=1	5	0.904271
tr|B1AHC9|B1AHC9_HUMAN	X-ray repair cross-complementing protein 6 OS=Homo sapiens GN=XRCC6 PE=1 SV=1	7	0.905396
sp|P28066|PSA5_HUMAN	Proteasome subunit alpha type-5 OS=Homo sapiens GN=PSMA5 PE=1 SV=3	2	0.90672
sp|P55084|ECHB_HUMAN	Trifunctional enzyme subunit beta, mitochondrial OS=Homo sapiens GN=HADHB PE=1 SV=3	10	0.908286
sp|P06733|ENOA_HUMAN	Alpha-enolase OS=Homo sapiens GN=ENO1 PE=1 SV=2	33	0.908515
tr|A0A087WWP4|A0A087WWP4_HUMAN	Putative RNA-binding protein 15 OS=Homo sapiens GN=RBM15 PE=1 SV=1	1	0.913456
sp|P62753|RS6_HUMAN	40S ribosomal protein S6 OS=Homo sapiens GN=RPS6 PE=1 SV=1	2	0.913793
sp|P47712|PA24A_HUMAN	Cytosolic phospholipase A2 OS=Homo sapiens GN=PLA2G4A PE=1 SV=2	1	0.914045
sp|Q9UM22|EPDR1_HUMAN	Mammalian ependymin-related protein 1 OS=Homo sapiens GN=EPDR1 PE=1 SV=2	1	0.914235
sp|P60174|TPIS_HUMAN	Triosephosphate isomerase OS=Homo sapiens GN=TPI1 PE=1 SV=3	18	0.917396
tr|X6RFL8|X6RFL8_HUMAN	Ras-related protein Rab-14 (Fragment) OS=Homo sapiens GN=RAB14 PE=1 SV=1	1	0.923761
sp|P15104|GLNA_HUMAN	Glutamine synthetase OS=Homo sapiens GN=GLUL PE=1 SV=4	1	0.923821
sp|Q15691|MARE1_HUMAN	Microtubule-associated protein RP/EB family member 1 OS=Homo sapiens GN=MAPRE1 PE=1 SV=3	1	0.9252
sp|P49207|RL34_HUMAN	60S ribosomal protein L34 OS=Homo sapiens GN=RPL34 PE=1 SV=3	1	0.925219
sp|P00390|GSHR_HUMAN	Glutathione reductase, mitochondrial OS=Homo sapiens GN=GSR PE=1 SV=2	5	0.925728
tr|A0A0A0MSI0|A0A0A0MSI0_HUMAN	Peroxiredoxin-1 (Fragment) OS=Homo sapiens GN=PRDX1 PE=1 SV=1	7	0.932912
sp|Q86VP6|CAND1_HUMAN	Cullin-associated NEDD8-dissociated protein 1 OS=Homo sapiens GN=CAND1 PE=1 SV=2	1	0.934833
sp|P17655|CAN2_HUMAN	Calpain-2 catalytic subunit OS=Homo sapiens GN=CAPN2 PE=1 SV=6	1	0.93588
tr|G3V5Z7|G3V5Z7_HUMAN	Proteasome subunit alpha type OS=Homo sapiens GN=PSMA6 PE=1 SV=1	6	0.936636
sp|Q01518|CAP1_HUMAN	Adenylyl cyclase-associated protein 1 OS=Homo sapiens GN=CAP1 PE=1 SV=5	9	0.93833
sp|P55884|EIF3B_HUMAN	Eukaryotic translation initiation factor 3 subunit B OS=Homo sapiens GN=EIF3B PE=1 SV=3	1	0.940526
tr|A6NEL0|A6NEL0_HUMAN	Non-histone chromosomal protein HMG-14 OS=Homo sapiens GN=HMGN1 PE=1 SV=1	2	0.941216
sp|P62258|1433E_HUMAN	14-3-3 protein epsilon OS=Homo sapiens GN=YWHAE PE=1 SV=1	7	0.943059
sp|P13639|EF2_HUMAN	Elongation factor 2 OS=Homo sapiens GN=EEF2 PE=1 SV=4	17	0.943257
tr|M0R0Y2|M0R0Y2_HUMAN	Alpha-soluble NSF attachment protein OS=Homo sapiens GN=NAPA PE=1 SV=1	3	0.945699
tr|A0A087WYC1|A0A087WYC1_HUMAN	Heat shock 70 kDa protein 4 OS=Homo sapiens GN=HSPA4 PE=1 SV=1	2	0.94928
sp|P28072|PSB6_HUMAN	Proteasome subunit beta type-6 OS=Homo sapiens GN=PSMB6 PE=1 SV=4	1	0.95064
sp|P37108|SRP14_HUMAN	Signal recognition particle 14 kDa protein OS=Homo sapiens GN=SRP14 PE=1 SV=2	1	0.952478
tr|A0A0A0MTS2|A0A0A0MTS2_HUMAN	Glucose-6-phosphate isomerase (Fragment) OS=Homo sapiens GN=GPI PE=1 SV=1	22	0.955825
sp|P09382|LEG1_HUMAN	Galectin-1 OS=Homo sapiens GN=LGALS1 PE=1 SV=2	4	0.957816
tr|J3KTL2|J3KTL2_HUMAN	Serine/arginine-rich-splicing factor 1 OS=Homo sapiens GN=SRSF1 PE=1 SV=1	3	0.960409
sp|P21964|COMT_HUMAN	Catechol O-methyltransferase OS=Homo sapiens GN=COMT PE=1 SV=2	1	0.96067
sp|P37802|TAGL2_HUMAN	Transgelin-2 OS=Homo sapiens GN=TAGLN2 PE=1 SV=3	10	0.963973
sp|P35268|RL22_HUMAN	60S ribosomal protein L22 OS=Homo sapiens GN=RPL22 PE=1 SV=2	2	0.973278
sp|P29401|TKT_HUMAN	Transketolase OS=Homo sapiens GN=TKT PE=1 SV=3	16	0.977955
sp|P16152|CBR1_HUMAN	Carbonyl reductase [NADPH] 1 OS=Homo sapiens GN=CBR1 PE=1 SV=3	1	0.983519
tr|H3BT58|H3BT58_HUMAN	Coactosin-like protein OS=Homo sapiens GN=COTL1 PE=1 SV=1	1	0.984907
sp|P63244|RACK1_HUMAN	Receptor of activated protein C kinase 1 OS=Homo sapiens GN=RACK1 PE=1 SV=3	12	0.986817
tr|Q5VZU9|Q5VZU9_HUMAN	Tripeptidyl-peptidase 2 OS=Homo sapiens GN=TPP2 PE=1 SV=1	3	0.992248
tr|H0YIV4|H0YIV4_HUMAN	Nucleosome assembly protein 1-like 1 (Fragment) OS=Homo sapiens GN=NAP1L1 PE=1 SV=1	4	0.992296
sp|P00441|SODC_HUMAN	Superoxide dismutase [Cu-Zn] OS=Homo sapiens GN=SOD1 PE=1 SV=2	4	0.993308
sp|Q9Y3B4|SF3B6_HUMAN	Splicing factor 3B subunit 6 OS=Homo sapiens GN=SF3B6 PE=1 SV=1	1	0.995757
sp|Q9BZZ5|API5_HUMAN	Apoptosis inhibitor 5 OS=Homo sapiens GN=API5 PE=1 SV=3	1	0.997588
tr|A0A087X1K9|A0A087X1K9_HUMAN	Acyl-protein thioesterase 1 OS=Homo sapiens GN=LYPLA1 PE=1 SV=1	4	1
sp|P04075|ALDOA_HUMAN	Fructose-bisphosphate aldolase A OS=Homo sapiens GN=ALDOA PE=1 SV=2	20	1.00328
tr|E9PRY8|E9PRY8_HUMAN	Elongation factor 1-delta OS=Homo sapiens GN=EEF1D PE=1 SV=1	5	1.00554
sp|P21333|FLNA_HUMAN	Filamin-A OS=Homo sapiens GN=FLNA PE=1 SV=4	21	1.00987
sp|Q99436|PSB7_HUMAN	Proteasome subunit beta type-7 OS=Homo sapiens GN=PSMB7 PE=1 SV=1	1	1.01008
sp|O43707|ACTN4_HUMAN	Alpha-actinin-4 OS=Homo sapiens GN=ACTN4 PE=1 SV=2	25	1.01029
sp|Q16543|CDC37_HUMAN	Hsp90 co-chaperone Cdc37 OS=Homo sapiens GN=CDC37 PE=1 SV=1	2	1.01252
sp|P55072|TERA_HUMAN	Transitional endoplasmic reticulum ATPase OS=Homo sapiens GN=VCP PE=1 SV=4	18	1.0126
sp|P23381|SYWC_HUMAN	Tryptophan--tRNA ligase, cytoplasmic OS=Homo sapiens GN=WARS PE=1 SV=2	3	1.01303
sp|P47914|RL29_HUMAN	60S ribosomal protein L29 OS=Homo sapiens GN=RPL29 PE=1 SV=2	2	1.01381
sp|P36578|RL4_HUMAN	60S ribosomal protein L4 OS=Homo sapiens GN=RPL4 PE=1 SV=5	4	1.01648
sp|Q15018|F175B_HUMAN	BRISC complex subunit Abro1 OS=Homo sapiens GN=FAM175B PE=1 SV=2	1	1.01932
sp|P23246|SFPQ_HUMAN	Splicing factor, proline- and glutamine-rich OS=Homo sapiens GN=SFPQ PE=1 SV=2	4	1.0284
tr|B1AHD1|B1AHD1_HUMAN	NHP2-like protein 1 OS=Homo sapiens GN=SNU13 PE=1 SV=1	1	1.03083
sp|P09429|HMGB1_HUMAN	High mobility group protein B1 OS=Homo sapiens GN=HMGB1 PE=1 SV=3	8	1.03088
sp|Q01130|SRSF2_HUMAN	Serine/arginine-rich splicing factor 2 OS=Homo sapiens GN=SRSF2 PE=1 SV=4	4	1.03138
sp|Q0VD83|APOBR_HUMAN	Apolipoprotein B receptor OS=Homo sapiens GN=APOBR PE=1 SV=2	1	1.03687
sp|Q14103|HNRPD_HUMAN	Heterogeneous nuclear ribonucleoprotein D0 OS=Homo sapiens GN=HNRNPD PE=1 SV=1	8	1.04113
sp|P63151|2ABA_HUMAN	Serine/threonine-protein phosphatase 2A 55 kDa regulatory subunit B alpha isoform OS=Homo sapiens GN=PPP2R2A PE=1 SV=1	1	1.04144
tr|E7EQR4|E7EQR4_HUMAN	Ezrin OS=Homo sapiens GN=EZR PE=1 SV=3	11	1.04239
tr|B7Z6Z4|B7Z6Z4_HUMAN	Myosin light polypeptide 6 OS=Homo sapiens GN=MYL6 PE=1 SV=1	4	1.04475
tr|H0YMZ1|H0YMZ1_HUMAN	Proteasome subunit alpha type (Fragment) OS=Homo sapiens GN=PSMA4 PE=1 SV=8	2	1.04591
sp|O76096|CYTF_HUMAN	Cystatin-F OS=Homo sapiens GN=CST7 PE=1 SV=1	1	1.04827
sp|O43765|SGTA_HUMAN	Small glutamine-rich tetratricopeptide repeat-containing protein alpha OS=Homo sapiens GN=SGTA PE=1 SV=1	1	1.04897
tr|J3QQ67|J3QQ67_HUMAN	60S ribosomal protein L18 (Fragment) OS=Homo sapiens GN=RPL18 PE=1 SV=1	3	1.05202
sp|O14745|NHRF1_HUMAN	Na(+)/H(+) exchange regulatory cofactor NHE-RF1 OS=Homo sapiens GN=SLC9A3R1 PE=1 SV=4	2	1.05569
tr|E7EQT4|E7EQT4_HUMAN	Apoptotic chromatin condensation inducer in the nucleus OS=Homo sapiens GN=ACIN1 PE=1 SV=2	1	1.05584
tr|E9PEB5|E9PEB5_HUMAN	Far upstream element-binding protein 1 OS=Homo sapiens GN=FUBP1 PE=1 SV=1	3	1.05666
sp|Q9GZN8|CT027_HUMAN	UPF0687 protein C20orf27 OS=Homo sapiens GN=C20orf27 PE=1 SV=3	1	1.05804
sp|P84090|ERH_HUMAN	Enhancer of rudimentary homolog OS=Homo sapiens GN=ERH PE=1 SV=1	2	1.05923
sp|O76021|RL1D1_HUMAN	Ribosomal L1 domain-containing protein 1 OS=Homo sapiens GN=RSL1D1 PE=1 SV=3	1	1.06056
tr|B4DJV2|B4DJV2_HUMAN	Citrate synthase OS=Homo sapiens GN=CS PE=1 SV=1	4	1.06185
sp|P62081|RS7_HUMAN	40S ribosomal protein S7 OS=Homo sapiens GN=RPS7 PE=1 SV=1	4	1.06387
sp|P78371|TCPB_HUMAN	T-complex protein 1 subunit beta OS=Homo sapiens GN=CCT2 PE=1 SV=4	9	1.06894
sp|P12004|PCNA_HUMAN	Proliferating cell nuclear antigen OS=Homo sapiens GN=PCNA PE=1 SV=1	4	1.06991
tr|X6R8A1|X6R8A1_HUMAN	Carboxypeptidase OS=Homo sapiens GN=CTSA PE=1 SV=1	2	1.07479
tr|Q5T985|Q5T985_HUMAN	Inter-alpha-trypsin inhibitor heavy chain H2 OS=Homo sapiens GN=ITIH2 PE=1 SV=1	2	1.07854
tr|E7EQV9|E7EQV9_HUMAN	Ribosomal protein L15 (Fragment) OS=Homo sapiens GN=RPL15 PE=1 SV=1	3	1.08294
sp|P63000|RAC1_HUMAN	Ras-related C3 botulinum toxin substrate 1 OS=Homo sapiens GN=RAC1 PE=1 SV=1	3	1.08394
sp|P62304|RUXE_HUMAN	Small nuclear ribonucleoprotein E OS=Homo sapiens GN=SNRPE PE=1 SV=1	1	1.08579
tr|B4DY09|B4DY09_HUMAN	Interleukin enhancer-binding factor 2 OS=Homo sapiens GN=ILF2 PE=1 SV=1	2	1.086
sp|P26038|MOES_HUMAN	Moesin OS=Homo sapiens GN=MSN PE=1 SV=3	30	1.094
sp|Q02878|RL6_HUMAN	60S ribosomal protein L6 OS=Homo sapiens GN=RPL6 PE=1 SV=3	5	1.10063
sp|O95831|AIFM1_HUMAN	Apoptosis-inducing factor 1, mitochondrial OS=Homo sapiens GN=AIFM1 PE=1 SV=1	3	1.10103
sp|P26447|S10A4_HUMAN	Protein S100-A4 OS=Homo sapiens GN=S100A4 PE=1 SV=1	2	1.1013
sp|Q99497|PARK7_HUMAN	Protein DJ-1 OS=Homo sapiens GN=PARK7 PE=1 SV=2	6	1.11262
sp|P31689|DNJA1_HUMAN	DnaJ homolog subfamily A member 1 OS=Homo sapiens GN=DNAJA1 PE=1 SV=2	1	1.12052
sp|P62750|RL23A_HUMAN	60S ribosomal protein L23a OS=Homo sapiens GN=RPL23A PE=1 SV=1	2	1.12178
tr|B7ZKW8|B7ZKW8_HUMAN	CapZ-interacting protein OS=Homo sapiens GN=RCSD1 PE=1 SV=1	1	1.1261
sp|P42768|WASP_HUMAN	Wiskott-Aldrich syndrome protein OS=Homo sapiens GN=WAS PE=1 SV=4	2	1.12701
tr|B1AK88|B1AK88_HUMAN	Capping protein (Actin filament) muscle Z-line, beta, isoform CRA_d OS=Homo sapiens GN=CAPZB PE=1 SV=1	1	1.12951
sp|P12814|ACTN1_HUMAN	Alpha-actinin-1 OS=Homo sapiens GN=ACTN1 PE=1 SV=2	18	1.14076
sp|Q9Y265|RUVB1_HUMAN	RuvB-like 1 OS=Homo sapiens GN=RUVBL1 PE=1 SV=1	2	1.15052
sp|P13796|PLSL_HUMAN	Plastin-2 OS=Homo sapiens GN=LCP1 PE=1 SV=6	28	1.15159
sp|P37837|TALDO_HUMAN	Transaldolase OS=Homo sapiens GN=TALDO1 PE=1 SV=2	4	1.1569
sp|P09211|GSTP1_HUMAN	Glutathione S-transferase P OS=Homo sapiens GN=GSTP1 PE=1 SV=2	9	1.16536
sp|O00567|NOP56_HUMAN	Nucleolar protein 56 OS=Homo sapiens GN=NOP56 PE=1 SV=4	1	1.17297
sp|P14618|KPYM_HUMAN	Pyruvate kinase PKM OS=Homo sapiens GN=PKM PE=1 SV=4	36	1.17796
tr|Q32Q12|Q32Q12_HUMAN	Nucleoside diphosphate kinase OS=Homo sapiens GN=NME1-NME2 PE=1 SV=1	5	1.18299
tr|A0A075B738|A0A075B738_HUMAN	Platelet endothelial cell adhesion molecule OS=Homo sapiens GN=PECAM1 PE=1 SV=1	2	1.18657
tr|A0A0A0MRM9|A0A0A0MRM9_HUMAN	Nucleolar and coiled-body phosphoprotein 1 (Fragment) OS=Homo sapiens GN=NOLC1 PE=1 SV=1	7	1.18745
sp|P50395|GDIB_HUMAN	Rab GDP dissociation inhibitor beta OS=Homo sapiens GN=GDI2 PE=1 SV=2	9	1.18829
sp|P68133|ACTS_HUMAN	Actin, alpha skeletal muscle OS=Homo sapiens GN=ACTA1 PE=1 SV=1	13	1.19697
sp|Q9NUQ9|FA49B_HUMAN	Protein FAM49B OS=Homo sapiens GN=FAM49B PE=1 SV=1	3	1.19925
tr|M0QY97|M0QY97_HUMAN	Zinc finger CCCH domain-containing protein 4 (Fragment) OS=Homo sapiens GN=ZC3H4 PE=1 SV=1	2	1.21232
sp|Q12906|ILF3_HUMAN	Interleukin enhancer-binding factor 3 OS=Homo sapiens GN=ILF3 PE=1 SV=3	5	1.21309
sp|P52209|6PGD_HUMAN	6-phosphogluconate dehydrogenase, decarboxylating OS=Homo sapiens GN=PGD PE=1 SV=3	6	1.22697
sp|Q9HB71|CYBP_HUMAN	Calcyclin-binding protein OS=Homo sapiens GN=CACYBP PE=1 SV=2	3	1.23122
sp|Q15393|SF3B3_HUMAN	Splicing factor 3B subunit 3 OS=Homo sapiens GN=SF3B3 PE=1 SV=4	5	1.23782
sp|P62424|RL7A_HUMAN	60S ribosomal protein L7a OS=Homo sapiens GN=RPL7A PE=1 SV=2	7	1.2386
tr|A0A087WTT1|A0A087WTT1_HUMAN	Polyadenylate-binding protein OS=Homo sapiens GN=PABPC1 PE=1 SV=1	6	1.24536
sp|P42677|RS27_HUMAN	40S ribosomal protein S27 OS=Homo sapiens GN=RPS27 PE=1 SV=3	1	1.24639
tr|C9JCJ5|C9JCJ5_HUMAN	Uncharacterized protein (Fragment) OS=Homo sapiens PE=4 SV=10	1	1.25742
sp|P19525|E2AK2_HUMAN	Interferon-induced, double-stranded RNA-activated protein kinase OS=Homo sapiens GN=EIF2AK2 PE=1 SV=2	2	1.25841
tr|C9IZG4|C9IZG4_HUMAN	Protein CutA OS=Homo sapiens GN=CUTA PE=1 SV=1	2	1.26247
sp|P28070|PSB4_HUMAN	Proteasome subunit beta type-4 OS=Homo sapiens GN=PSMB4 PE=1 SV=4	2	1.27059
tr|A0A087X090|A0A087X090_HUMAN	Farnesyl diphosphate synthase (Farnesyl pyrophosphate synthetase, dimethylallyltranstransferase, geranyltranstransferase), isoform CRA_a OS=Homo sapiens GN=FDPS PE=1 SV=1	1	1.27562
tr|F8W1A4|F8W1A4_HUMAN	Adenylate kinase 2, mitochondrial OS=Homo sapiens GN=AK2 PE=1 SV=1	9	1.28239
sp|P12270|TPR_HUMAN	Nucleoprotein TPR OS=Homo sapiens GN=TPR PE=1 SV=3	5	1.29017
sp|P31948|STIP1_HUMAN	Stress-induced-phosphoprotein 1 OS=Homo sapiens GN=STIP1 PE=1 SV=1	5	1.29952
sp|P40925|MDHC_HUMAN	Malate dehydrogenase, cytoplasmic OS=Homo sapiens GN=MDH1 PE=1 SV=4	7	1.30058
sp|P23526|SAHH_HUMAN	Adenosylhomocysteinase OS=Homo sapiens GN=AHCY PE=1 SV=4	5	1.30256
sp|P11142|HSP7C_HUMAN	Heat shock cognate 71 kDa protein OS=Homo sapiens GN=HSPA8 PE=1 SV=1	22	1.30478
tr|G3V126|G3V126_HUMAN	ATPase, H+ transporting, lysosomal 50/57kDa, V1 subunit H, isoform CRA_c OS=Homo sapiens GN=ATP6V1H PE=1 SV=1	3	1.30547
sp|P62913|RL11_HUMAN	60S ribosomal protein L11 OS=Homo sapiens GN=RPL11 PE=1 SV=2	1	1.30936
sp|Q9H2U2|IPYR2_HUMAN	Inorganic pyrophosphatase 2, mitochondrial OS=Homo sapiens GN=PPA2 PE=1 SV=2	4	1.31229
sp|P25398|RS12_HUMAN	40S ribosomal protein S12 OS=Homo sapiens GN=RPS12 PE=1 SV=3	6	1.31397
sp|P42167|LAP2B_HUMAN	Lamina-associated polypeptide 2, isoforms beta/gamma OS=Homo sapiens GN=TMPO PE=1 SV=2	4	1.31715
sp|P16949|STMN1_HUMAN	Stathmin OS=Homo sapiens GN=STMN1 PE=1 SV=3	5	1.32005
tr|C9J9K3|C9J9K3_HUMAN	40S ribosomal protein SA (Fragment) OS=Homo sapiens GN=RPSA PE=1 SV=8	7	1.32464
sp|P04406|G3P_HUMAN	Glyceraldehyde-3-phosphate dehydrogenase OS=Homo sapiens GN=GAPDH PE=1 SV=3	18	1.32909
sp|Q9Y266|NUDC_HUMAN	Nuclear migration protein nudC OS=Homo sapiens GN=NUDC PE=1 SV=1	3	1.33329
tr|A0A0G2JIW1|A0A0G2JIW1_HUMAN	Heat shock 70 kDa protein 1B OS=Homo sapiens GN=HSPA1B PE=1 SV=1	10	1.34071
sp|P23396|RS3_HUMAN	40S ribosomal protein S3 OS=Homo sapiens GN=RPS3 PE=1 SV=2	5	1.34502
tr|A0A1P0AYU5|A0A1P0AYU5_HUMAN	Sideroflexin OS=Homo sapiens GN=SFXN3 PE=1 SV=1	4	1.34707
sp|P04264|K2C1_HUMAN	Keratin, type II cytoskeletal 1 OS=Homo sapiens GN=KRT1 PE=1 SV=6	11	1.35724
sp|P06748|NPM_HUMAN	Nucleophosmin OS=Homo sapiens GN=NPM1 PE=1 SV=2	7	1.35732
sp|P08708|RS17_HUMAN	40S ribosomal protein S17 OS=Homo sapiens GN=RPS17 PE=1 SV=2	3	1.36349
sp|Q8NBX0|SCPDL_HUMAN	Saccharopine dehydrogenase-like oxidoreductase OS=Homo sapiens GN=SCCPDH PE=1 SV=1	4	1.36497
sp|Q99805|TM9S2_HUMAN	Transmembrane 9 superfamily member 2 OS=Homo sapiens GN=TM9SF2 PE=1 SV=1	2	1.38213
sp|O95881|TXD12_HUMAN	Thioredoxin domain-containing protein 12 OS=Homo sapiens GN=TXNDC12 PE=1 SV=1	2	1.39535
tr|H0YN26|H0YN26_HUMAN	Acidic leucine-rich nuclear phosphoprotein 32 family member A OS=Homo sapiens GN=ANP32A PE=1 SV=1	5	1.39594
sp|E9PAV3|NACAM_HUMAN	Nascent polypeptide-associated complex subunit alpha, muscle-specific form OS=Homo sapiens GN=NACA PE=1 SV=1	5	1.3982
tr|H0Y449|H0Y449_HUMAN	Nuclease-sensitive element-binding protein 1 (Fragment) OS=Homo sapiens GN=YBX1 PE=1 SV=1	7	1.39894
sp|P07195|LDHB_HUMAN	L-lactate dehydrogenase B chain OS=Homo sapiens GN=LDHB PE=1 SV=2	14	1.4225
sp|Q96HE7|ERO1A_HUMAN	ERO1-like protein alpha OS=Homo sapiens GN=ERO1A PE=1 SV=2	5	1.43327
sp|P13645|K1C10_HUMAN	Keratin, type I cytoskeletal 10 OS=Homo sapiens GN=KRT10 PE=1 SV=6	9	1.44097
tr|X5D2R7|X5D2R7_HUMAN	Proteasome subunit beta type OS=Homo sapiens GN=PSM8 PE=1 SV=1	1	1.442
sp|Q9NQR4|NIT2_HUMAN	Omega-amidase NIT2 OS=Homo sapiens GN=NIT2 PE=1 SV=1	4	1.44334
tr|E9PB61|E9PB61_HUMAN	THO complex subunit 4 OS=Homo sapiens GN=ALYREF PE=1 SV=1	2	1.46029
tr|H7C3P4|H7C3P4_HUMAN	N-acetylglucosamine-6-sulfatase OS=Homo sapiens GN=GNS PE=1 SV=1	4	1.46192
sp|P12724|ECP_HUMAN	Eosinophil cationic protein OS=Homo sapiens GN=RNASE3 PE=1 SV=2	3	1.47421
tr|S4R456|S4R456_HUMAN	40S ribosomal protein S15 (Fragment) OS=Homo sapiens GN=RPS15 PE=1 SV=1	2	1.47831
tr|F8W914|F8W914_HUMAN	Reticulon OS=Homo sapiens GN=RTN4 PE=1 SV=1	6	1.48115
sp|O60568|PLOD3_HUMAN	Procollagen-lysine,2-oxoglutarate 5-dioxygenase 3 OS=Homo sapiens GN=PLOD3 PE=1 SV=1	3	1.48135
tr|H3BVG0|H3BVG0_HUMAN	Nuclear pore complex protein Nup93 OS=Homo sapiens GN=NUP93 PE=1 SV=1	2	1.48227
sp|Q99536|VAT1_HUMAN	Synaptic vesicle membrane protein VAT-1 homolog OS=Homo sapiens GN=VAT1 PE=1 SV=2	6	1.506
tr|Q5T4U5|Q5T4U5_HUMAN	Acyl-Coenzyme A dehydrogenase, C-4 to C-12 straight chain, isoform CRA_a OS=Homo sapiens GN=ACADM PE=1 SV=1	4	1.51386
sp|P00492|HPRT_HUMAN	Hypoxanthine-guanine phosphoribosyltransferase OS=Homo sapiens GN=HPRT1 PE=1 SV=2	2	1.52095
sp|Q9Y5J1|UTP18_HUMAN	U3 small nucleolar RNA-associated protein 18 homolog OS=Homo sapiens GN=UTP18 PE=1 SV=3	1	1.5226
sp|P62906|RL10A_HUMAN	60S ribosomal protein L10a OS=Homo sapiens GN=RPL10A PE=1 SV=2	3	1.52565
sp|Q10471|GALT2_HUMAN	Polypeptide N-acetylgalactosaminyltransferase 2 OS=Homo sapiens GN=GALNT2 PE=1 SV=1	1	1.53253
sp|P26373|RL13_HUMAN	60S ribosomal protein L13 OS=Homo sapiens GN=RPL13 PE=1 SV=4	3	1.53789
sp|P62979|RS27A_HUMAN	Ubiquitin-40S ribosomal protein S27a OS=Homo sapiens GN=RPS27A PE=1 SV=2	5	1.54047
sp|P00338|LDHA_HUMAN	L-lactate dehydrogenase A chain OS=Homo sapiens GN=LDHA PE=1 SV=2	12	1.54536
sp|P62851|RS25_HUMAN	40S ribosomal protein S25 OS=Homo sapiens GN=RPS25 PE=1 SV=1	2	1.5488
sp|P68371|TBB4B_HUMAN	Tubulin beta-4B chain OS=Homo sapiens GN=TUBB4B PE=1 SV=1	22	1.55004
sp|Q8NC51|PAIRB_HUMAN	Plasminogen activator inhibitor 1 RNA-binding protein OS=Homo sapiens GN=SERBP1 PE=1 SV=2	5	1.55112
sp|Q99613|EIF3C_HUMAN	Eukaryotic translation initiation factor 3 subunit C OS=Homo sapiens GN=EIF3C PE=1 SV=1	2	1.55167
sp|Q15424|SAFB1_HUMAN	Scaffold attachment factor B1 OS=Homo sapiens GN=SAFB PE=1 SV=4	2	1.55328
sp|P84103|SRSF3_HUMAN	Serine/arginine-rich splicing factor 3 OS=Homo sapiens GN=SRSF3 PE=1 SV=1	2	1.55853
sp|P80723|BASP1_HUMAN	Brain acid soluble protein 1 OS=Homo sapiens GN=BASP1 PE=1 SV=2	5	1.56117
sp|P46013|KI67_HUMAN	Proliferation marker protein Ki-67 OS=Homo sapiens GN=MKI67 PE=1 SV=2	1	1.56188
sp|Q08945|SSRP1_HUMAN	FACT complex subunit SSRP1 OS=Homo sapiens GN=SSRP1 PE=1 SV=1	2	1.56651
sp|P20700|LMNB1_HUMAN	Lamin-B1 OS=Homo sapiens GN=LMNB1 PE=1 SV=2	3	1.56767
sp|Q06323|PSME1_HUMAN	Proteasome activator complex subunit 1 OS=Homo sapiens GN=PSME1 PE=1 SV=1	5	1.56879
sp|P07437|TBB5_HUMAN	Tubulin beta chain OS=Homo sapiens GN=TUBB PE=1 SV=2	22	1.57382
sp|Q07065|CKAP4_HUMAN	Cytoskeleton-associated protein 4 OS=Homo sapiens GN=CKAP4 PE=1 SV=2	4	1.57405
tr|E9PAL7|E9PAL7_HUMAN	Translocon-associated protein subunit alpha OS=Homo sapiens GN=SSR1 PE=1 SV=1	3	1.57462
sp|Q15233|NONO_HUMAN	Non-POU domain-containing octamer-binding protein OS=Homo sapiens GN=NONO PE=1 SV=4	3	1.57532
sp|P08311|CATG_HUMAN	Cathepsin G OS=Homo sapiens GN=CTSG PE=1 SV=2	4	1.57845
tr|F8WF02|F8WF02_HUMAN	Pyruvate dehydrogenase E1 component subunit beta, mitochondrial OS=Homo sapiens GN=PDHB PE=1 SV=1	1	1.58435
sp|P35908|K22E_HUMAN	Keratin, type II cytoskeletal 2 epidermal OS=Homo sapiens GN=KRT2 PE=1 SV=2	10	1.5844
sp|P46777|RL5_HUMAN	60S ribosomal protein L5 OS=Homo sapiens GN=RPL5 PE=1 SV=3	4	1.58883
sp|Q32P28|P3H1_HUMAN	Prolyl 3-hydroxylase 1 OS=Homo sapiens GN=P3H1 PE=1 SV=2	5	1.59293
sp|P31949|S10AB_HUMAN	Protein S100-A11 OS=Homo sapiens GN=S100A11 PE=1 SV=2	2	1.5951
sp|P30050|RL12_HUMAN	60S ribosomal protein L12 OS=Homo sapiens GN=RPL12 PE=1 SV=1	6	1.59922
tr|A0A024RA52|A0A024RA52_HUMAN	Proteasome subunit alpha type OS=Homo sapiens GN=PSMA2 PE=1 SV=1	4	1.6039
sp|P36542|ATPG_HUMAN	ATP synthase subunit gamma, mitochondrial OS=Homo sapiens GN=ATP5C1 PE=1 SV=1	5	1.6048
tr|D6RG13|D6RG13_HUMAN	40S ribosomal protein S3a (Fragment) OS=Homo sapiens GN=RPS3A PE=1 SV=1	5	1.61301
tr|F8W031|F8W031_HUMAN	Uncharacterized protein (Fragment) OS=Homo sapiens PE=1 SV=1	5	1.62813
sp|P08670|VIME_HUMAN	Vimentin OS=Homo sapiens GN=VIM PE=1 SV=4	8	1.6347
tr|A0A0R4J2G3|A0A0R4J2G3_HUMAN	Arylacetamide deacetylase-like 1 OS=Homo sapiens GN=NCEH1 PE=1 SV=1	2	1.63722
sp|P52907|CAZA1_HUMAN	F-actin-capping protein subunit alpha-1 OS=Homo sapiens GN=CAPZA1 PE=1 SV=3	7	1.64496
sp|P04792|HSPB1_HUMAN	Heat shock protein beta-1 OS=Homo sapiens GN=HSPB1 PE=1 SV=2	2	1.64504
sp|Q9H9B4|SFXN1_HUMAN	Sideroflexin-1 OS=Homo sapiens GN=SFXN1 PE=1 SV=4	4	1.6738
sp|P06737|PYGL_HUMAN	Glycogen phosphorylase, liver form OS=Homo sapiens GN=PYGL PE=1 SV=4	3	1.67732
tr|J3KPF3|J3KPF3_HUMAN	4F2 cell-surface antigen heavy chain OS=Homo sapiens GN=SLC3A2 PE=1 SV=1	4	1.68949
sp|Q8TCT9|HM13_HUMAN	Minor histocompatibility antigen H13 OS=Homo sapiens GN=HM13 PE=1 SV=1	6	1.69044
sp|O75533|SF3B1_HUMAN	Splicing factor 3B subunit 1 OS=Homo sapiens GN=SF3B1 PE=1 SV=3	1	1.70084
sp|P25815|S100P_HUMAN	Protein S100-P OS=Homo sapiens GN=S100P PE=1 SV=2	2	1.70779
tr|H0YNW5|H0YNW5_HUMAN	Deoxyuridine 5'-triphosphate nucleotidohydrolase, mitochondrial OS=Homo sapiens GN=DUT PE=1 SV=1	6	1.70916
sp|P19367|HXK1_HUMAN	Hexokinase-1 OS=Homo sapiens GN=HK1 PE=1 SV=3	2	1.70991
sp|P38606|VATA_HUMAN	V-type proton ATPase catalytic subunit A OS=Homo sapiens GN=ATP6V1A PE=1 SV=2	7	1.71253
tr|F8W0W8|F8W0W8_HUMAN	Serine/threonine-protein phosphatase OS=Homo sapiens GN=PPP1CC PE=1 SV=1	2	1.71559
sp|P39019|RS19_HUMAN	40S ribosomal protein S19 OS=Homo sapiens GN=RPS19 PE=1 SV=2	4	1.73047
sp|P13667|PDIA4_HUMAN	Protein disulfide-isomerase A4 OS=Homo sapiens GN=PDIA4 PE=1 SV=2	21	1.73264
tr|I3L3P7|I3L3P7_HUMAN	40S ribosomal protein S15a OS=Homo sapiens GN=RPS15A PE=1 SV=1	1	1.75627
tr|A0A087WZM2|A0A087WZM2_HUMAN	Ribonuclease T2 OS=Homo sapiens GN=RNASET2 PE=1 SV=1	5	1.75714
sp|P48651|PTSS1_HUMAN	Phosphatidylserine synthase 1 OS=Homo sapiens GN=PTDSS1 PE=1 SV=1	2	1.76192
sp|P05387|RLA2_HUMAN	60S acidic ribosomal protein P2 OS=Homo sapiens GN=RPLP2 PE=1 SV=1	5	1.77458
sp|Q08722|CD47_HUMAN	Leukocyte surface antigen CD47 OS=Homo sapiens GN=CD47 PE=1 SV=1	2	1.78418
sp|Q15637|SF01_HUMAN	Splicing factor 1 OS=Homo sapiens GN=SF1 PE=1 SV=4	2	1.78592
tr|H3BMH2|H3BMH2_HUMAN	Ras-related protein Rab-11A (Fragment) OS=Homo sapiens GN=RAB11A PE=4 SV=1	4	1.78915
sp|P05556|ITB1_HUMAN	Integrin beta-1 OS=Homo sapiens GN=ITGB1 PE=1 SV=2	2	1.80044
sp|P04899|GNAI2_HUMAN	Guanine nucleotide-binding protein G(i) subunit alpha-2 OS=Homo sapiens GN=GNAI2 PE=1 SV=3	3	1.81579
sp|P29966|MARCS_HUMAN	Myristoylated alanine-rich C-kinase substrate OS=Homo sapiens GN=MARCKS PE=1 SV=4	1	1.81593
tr|E5RI99|E5RI99_HUMAN	60S ribosomal protein L30 (Fragment) OS=Homo sapiens GN=RPL30 PE=1 SV=1	5	1.81635
sp|P04004|VTNC_HUMAN	Vitronectin OS=Homo sapiens GN=VTN PE=1 SV=1	1	1.82369
sp|P05198|IF2A_HUMAN	Eukaryotic translation initiation factor 2 subunit 1 OS=Homo sapiens GN=EIF2S1 PE=1 SV=3	3	1.83823
sp|P24752|THIL_HUMAN	Acetyl-CoA acetyltransferase, mitochondrial OS=Homo sapiens GN=ACAT1 PE=1 SV=1	10	1.8776
sp|O95336|6PGL_HUMAN	6-phosphogluconolactonase OS=Homo sapiens GN=PGLS PE=1 SV=2	1	1.89891
tr|C9JXB8|C9JXB8_HUMAN	60S ribosomal protein L24 OS=Homo sapiens GN=RPL24 PE=1 SV=1	1	1.9185
sp|P05388|RLA0_HUMAN	60S acidic ribosomal protein P0 OS=Homo sapiens GN=RPLP0 PE=1 SV=1	6	1.92234
sp|Q9UJS0|CMC2_HUMAN	Calcium-binding mitochondrial carrier protein Aralar2 OS=Homo sapiens GN=SLC25A13 PE=1 SV=2	5	1.93614
sp|P22234|PUR6_HUMAN	Multifunctional protein ADE2 OS=Homo sapiens GN=PAICS PE=1 SV=3	6	1.94366
sp|P43304|GPDM_HUMAN	Glycerol-3-phosphate dehydrogenase, mitochondrial OS=Homo sapiens GN=GPD2 PE=1 SV=3	8	1.94915
sp|Q8N339|MT1M_HUMAN	Metallothionein-1M OS=Homo sapiens GN=MT1M PE=3 SV=2	1	1.99669
